# Supplementary material for: Postmarket safety in Canada: are significant therapeutic advances and biologics less safe than other drugs? A cohort study
Source: PubMed Central journal article supplement — BMJ Open. 2014 Feb 18;4(2):e004289. doi: 10.1136/bmjopen-2013-004289 (PMC3931983; doi:10.1136/bmjopen-2013-004289), 2014-02-18
Supplement: bmjopen-2013-004289.draft_revisions.pdf [file bmjopen-2013-004289.draft_revisions.pdf]

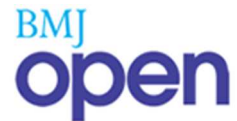

**Postmarket Safety in Canada: Are Significant Therapeutic Advances and Biologics Less Safe Than Other Drugs? A Cohort Study**

|                                 |                                                                                                                   |
|---------------------------------|-------------------------------------------------------------------------------------------------------------------|
| Journal:                        | <i>BMJ Open</i>                                                                                                   |
| Manuscript ID:                  | bmjopen-2013-004289                                                                                               |
| Article Type:                   | Research                                                                                                          |
| Date Submitted by the Author:   | 19-Oct-2013                                                                                                       |
| Complete List of Authors:       | Lexchin, Joel; York University, School of Health Policy & Management                                              |
| <b>Primary Subject Heading</b>: | Health policy                                                                                                     |
| Secondary Subject Heading:      | Pharmacology and therapeutics                                                                                     |
| Keywords:                       | CLINICAL PHARMACOLOGY, Health policy < HEALTH SERVICES ADMINISTRATION & MANAGEMENT, Adverse events < THERAPEUTICS |
|                                 |                                                                                                                   |

SCHOLARONE™  
Manuscripts

Peer Review Only

1  
2  
3 **Postmarket Safety in Canada: Are Significant Therapeutic Advances and Biologics**  
4  
5 **Less Safe Than Other Drugs? A Cohort Study**  
6  
7

8 Joel Lexchin

9  
10 Professor, School of Health Policy and Management

11  
12 York University

13  
14 *and*

15  
16 Emergency Physician

17  
18 University Health Network

19  
20 *and*

21  
22 Associate Professor

23  
24 Department of Family and Community Medicine

25  
26 University of Toronto

27  
28 Toronto, Ontario

29  
30 Correspondence:

31  
32 Joel Lexchin MD

33  
34 School of Health Policy and Management

35  
36 York University

37  
38 4700 Keele St.

39  
40 Toronto, ON M3J 1P3

41  
42 Tel: 416-736-2100 x 22119

43  
44 Fax: 416-736-5227

45  
46 E mail: [jlexchin@yorku.ca](mailto:jlexchin@yorku.ca)

1  
2  
3 **Key words:** biologics, Canada, drug safety, small molecule, therapeutic  
4  
5 potential  
6  
7

8 **Word count:** 2594  
9  
10  
11  
12  
13  
14  
15  
16  
17  
18  
19  
20  
21  
22  
23  
24  
25  
26  
27  
28  
29  
30  
31  
32  
33  
34  
35  
36  
37  
38  
39  
40  
41  
42  
43  
44  
45  
46  
47  
48  
49  
50  
51  
52  
53  
54  
55  
56  
57  
58  
59  
60

For peer review only

## ABSTRACT

### Background

When new drugs are introduced onto the market there is limited information available about their safety.

### Objectives

To compare postmarket safety in Canada in two areas: 1) traditional medications versus biologics; 2) medications that offer significant new therapeutic benefits versus those that do not.

### Methods

All new active substances (NAS) approved by the Therapeutic Products Directorate (TPD) from January 1 1997 to March 31, 2012 were identified. Products were classified as either significant therapeutic advances or no significant therapeutic advances and as traditional medications or biologics. Serious safety warnings and/or removals from the market for safety reasons were determined from the MedEffect web site. Kaplan-Meier survival curves were calculated separately for: a) biologic and traditional NAS and b) NAS that were therapeutic advances and those that were not.

### Results

406 NAS were approved and 87 had either a serious safety warning or were removed from the market for safety reasons. There was no difference in the probability of a traditional NAS acquiring a serious safety warning and/or being withdrawn versus a NAS of biologic origin. Similarly there was no difference for medications that were significant therapeutic advances versus those that were not.

## Conclusions

There is no difference in safety between traditional medications and biologics and no difference between drugs with significant therapeutic benefits and those without.

Although these results draw on Canadian data they are likely to be relevant internationally.

For peer review only

### Strengths and limitations of this study

- Systematic study of the postmarket safety comparing groups of drugs: biologics versus traditional medicines and drugs with significant therapeutic advances versus drugs without significant therapeutic advances
- Comparison of premarket regulatory evaluation of therapeutic advance with postmarket evaluation
- Unclear what criteria Health Canada uses to decide to issue serious safety warnings
- Unknown date on which drug actually marketed as opposed to date approved
- Postmarket therapeutic evaluation of all new drugs could not be determined

## INTRODUCTION

Drug safety is becoming a topic of increasing concern in Canada. In July 2008, the federal government officially launched the Drug Safety and Effectiveness Network (DSEN) designed to connect researchers throughout Canada in a virtual network to conduct post-market drug research (1) and stimulate research to study the impact of drug use in the real-world setting.(2) In 2010 the Health Council of Canada released a discussion paper that drew on international best practices for recommendations about how Canada could improve its developing system of active pharmacosurveillance.(3) Most recently, the Auditor General reported that Health Canada is slow to assess potential safety issues and can take more than two years to provide Canadians with new safety information.(4)

The increased focus on drug safety comes from a number of directions. In the United States (US), adverse drug reactions are estimated to be the fourth to sixth leading annual cause of death.(5) Since that estimate was made in the late 1990s, reported serious adverse drug events increased 2.6-fold from 1998 to 2005 and fatal adverse drug events increased 2.7-fold during the same period while the total number of outpatient prescriptions went up by only 40%.(6) While there are relatively few drugs withdrawn from the market for safety reasons (7) large numbers of people have been exposed to some of these products. In 2003, the year before rofecoxib (Vioxx®) was removed from the market it was the 10<sup>th</sup> most frequently prescribed medication in Canada.(8)

1  
2  
3 A recent analysis of drug safety in Canada found that almost 1 in 4 new active substances  
4 approved (NAS) between 1995 and 2010 either had a serious safety warning or were  
5 removed from the market for safety reasons. (A NAS is a molecule never previously  
6 marketed in any form in Canada. This designation is given to all molecules meeting the  
7 definition and therefore should not be seen as creating a division between “new” and  
8 “old” drugs.) This figure increased to more than 1 in 3 for products that received a  
9 priority review, i.e., products that Health Canada felt might provide an effective treatment  
10 of a disease for which no drug is presently marketed or a significant increase in efficacy  
11 and/or significant decrease in risk over existing therapies.(9) Priority reviews have a  
12 timeline of 180 days versus the standard timeline of 300 days.(10)  
13  
14  
15  
16  
17  
18  
19  
20  
21  
22  
23  
24  
25  
26  
27  
28

29 This study looks at two further areas of postmarket drug safety: 1) traditional medications  
30 (those derived from chemical manufacturing) and biologics; 2) medications that offer  
31 significant new therapeutic benefits and those that do not. Biologics are large molecules  
32 synthesized from living organisms and typically administered intravenously. As such  
33 they may have a significantly different safety profile compared to traditional small  
34 molecule medications that come from chemical synthesis and are usually ingested orally.  
35  
36  
37  
38  
39  
40  
41  
42  
43  
44  
45  
46  
47  
48  
49  
50  
51  
52  
53  
54  
55  
56  
57  
58  
59  
60

Regulators may be willing to approve drugs that offer significant therapeutic advances with more uncertainty about their safety compared to drugs that are not a significant therapeutic advance.

The specific hypotheses investigated here are: 1) there is no difference in the postmarket safety profile of traditional versus biologic medications, 2) there is no difference in the



1  
2  
3 postmarket safety profile of drugs with significant therapeutic advances versus those  
4  
5 without. A secondary objective was to determine how well the type of review that a NAS  
6  
7 received from Health Canada predicted the product's ultimate therapeutic value.  
8  
9

## 10 11 12 13 **METHODS**

14  
15 A list of NAS approved between January 1, 1997 and March 31, 2012 was compiled from  
16  
17 the annual reports of the Therapeutic Products Directorate (TPD) and the Biologic and  
18  
19 Genetic Therapies Directorate (BGTD) (henceforth collectively referred to as the TPD) -  
20  
21 available by directly contacting the directorates at <[publications@hc-sc.gc.ca](mailto:publications@hc-sc.gc.ca)>. For each  
22  
23 product the following information was abstracted: generic name, brand name,  
24  
25 manufacturer, indication, date of Notice of Compliance (NOC – marketing authorization),  
26  
27 type of review (priority or standard) and type of product (traditional or biologic). The  
28  
29 TPD annual reports only gave the type of product (traditional or biologic) from 2000  
30  
31 onwards.  
32  
33  
34  
35  
36  
37  
38

39 Two sources were used to determine the therapeutic value of the NAS: the annual reports  
40  
41 of the Patented Medicine Prices Review Board (PMPRB) available on-line from 2003 to  
42  
43 2011 at <<http://www.pmprb-cepmb.gc.ca/english/View.asp?x=91>> and for previous years  
44  
45 by directly contacting the PMPRB at <[pmprb@pmprb-cepmb.gc.ca](mailto:pmprb@pmprb-cepmb.gc.ca)> and the on-line  
46  
47 reviews published by Prescrire International up to February 14, 2013  
48  
49 <<http://english.prescrire.org/en/>>. These sources were chosen because their evaluations  
50  
51 are unambiguous and therefore do not require any subjective interpretation and they are  
52  
53 both available in English.  
54  
55  
56  
57  
58  
59  
60

1  
2  
3  
4  
5  
6 The PMPRB is a federal agency that is responsible for calculating the maximum  
7  
8 introductory price for all new patented medications introduced into the Canadian market.  
9  
10 As part of the process of determining the price, its Human Drug Advisory Panel  
11  
12 determines the therapeutic value of each product it reviews. Up until the end of 2009  
13  
14 NAS were classified into two groups: 1) breakthroughs or substantial improvement and  
15  
16 2) moderate, little or no therapeutic improvement. Since 2010 NAS are classified as  
17  
18 breakthrough or substantial improvement, moderate improvement (primary or secondary)  
19  
20 and slight or no improvement. For the purpose of this study products that were deemed  
21  
22 breakthrough and substantial improvement were termed “significant therapeutic advance”  
23  
24 and products in other groups were termed “no therapeutic advance”. In some cases the  
25  
26 PMPRB annual reports indicated that the therapeutic value of the product was still being  
27  
28 determined and in those cases the PMPRB was contacted directly to determine the final  
29  
30 classification. If the PMPRB had not considered a product then its therapeutic value was  
31  
32 determined from Prescrire evaluations. Prescrire rates products using the following  
33  
34 categories: bravo (major therapeutic innovation in an area where previously no treatment  
35  
36 was available); a real advance (important therapeutic innovation but has limitations);  
37  
38 offers an advantage (some value but does not fundamentally change the present  
39  
40 therapeutic practice); possibly helpful (minimal additional value and should not change  
41  
42 prescribing habits except in rare circumstances); nothing new (may be new molecule but  
43  
44 is superfluous because does not add to clinical possibilities offered by previously  
45  
46 available products); not acceptable (without evident benefit but with potential or real  
47  
48 disadvantages); judgement reserved (decision postponed until better data and more  
49  
50  
51  
52  
53  
54  
55  
56  
57  
58  
59  
60

1  
2  
3 thorough evaluation). The first 3 Prescrire categories were termed significant therapeutic  
4  
5 advance and the other Prescrire categories (except judgement reserved) were termed no  
6  
7 therapeutic advance.  
8  
9

10  
11  
12 Safety warnings and drug withdrawals for the period January 1, 1997 to December 31,  
13  
14 2012 were identified through advisories for health professionals on the MedEffect  
15  
16 Canada web site <[http://www.hc-sc.gc.ca/dhp-mps/medeff/advisories-avis/prof/index-  
17  
18 eng.php](http://www.hc-sc.gc.ca/dhp-mps/medeff/advisories-avis/prof/index-eng.php)>. For each safety advisory or notice of withdrawal of a product, the date and  
19  
20 reason was recorded. All serious safety advisories (those using bolded black print or  
21  
22 boxed warnings) were included except for those dealing with the withdrawal of a specific  
23  
24 batch or lot number due to manufacturing problems or those issued because of misuse of  
25  
26 a drug (e.g., an unapproved use) or medication errors (e.g., a warning about remembering  
27  
28 to remove a transdermal patch before applying a second one). When necessary, notices  
29  
30 on the MedEffect web site were supplemented by searching on the product name in the  
31  
32 Drug Product Database (DPD) <<http://webprod3.hc-sc.gc.ca/dpd-bdpp/index-eng.jsp>>.  
33  
34 The DPD contains product specific information on drugs approved for use in Canada and  
35  
36 all products discontinued since 1996.  
37  
38  
39  
40  
41  
42  
43  
44  
45

46 Troglitazone was approved but never marketed in Canada because of a dispute about its  
47  
48 introductory price. There was no information about revocation of its NOC on the  
49  
50 MedEffect web site. The drug was removed from the US market in March 2000 and  
51  
52 March 15, 2000 was arbitrarily used as its withdrawal date in Canada. It was retained in  
53  
54 the analysis because it was a product that was approved and then later shown to have side  
55  
56  
57  
58  
59  
60

1  
2  
3 effects serious enough that it needed to be withdrawn. The TPD annual reports list  
4  
5  
6 infliximab as two separate NAS since it was approved for two different indications –  
7  
8 Crohn’s disease and rheumatoid arthritis and therefore it is included twice.  
9

10  
11  
12 The time between receipt of a NOC and a safety warning and/or withdrawal from the  
13  
14 market was calculated in days. If a drug received more than one serious safety warning  
15  
16 only the time to the first warning was used. Medians are reported for the time from NOC  
17  
18 to serious safety warnings and/or withdrawal as these values are not normally distributed  
19  
20 (Shapiro-Wilk test). Kaplan-Meier survival curves were calculated separately for the  
21  
22 following comparisons: a) biologic versus traditional NAS and b) NAS that were  
23  
24 therapeutic advances versus those that were not.  
25  
26  
27  
28  
29  
30  
31

32 Health Canada gives a shorter priority review to drugs that provide a significant increase  
33  
34 in efficacy or a significant decrease in side effects compared to other available agents for  
35  
36 a serious, life-threatening or severely debilitating illness or condition, i.e., drugs that  
37  
38 Health Canada judges as significant therapeutic gains.<sup>(10)</sup> Health Canada’s accuracy in  
39  
40 evaluating a NAS’s therapeutic benefit was determined by comparing the review status  
41  
42 given to the drug (priority versus standard) with the therapeutic evaluation from the  
43  
44 PMPRB or Prescrire.  
45  
46  
47  
48  
49  
50

51 Calculations were done using Excel 2011 for Macintosh (Microsoft) and Prism  
52  
53 (GraphPad Software).  
54  
55  
56  
57  
58  
59  
60

## RESULTS

406 NAS were approved from January 1, 1997 to March 31, 2012. 87 (21.4%) were subject to either a serious safety warning and/or were withdrawn for safety reasons: 72 (17.7%) had only serious safety warnings and 15 (3.7%) were withdrawn (8 had safety warnings first and 7 were withdrawn without any prior safety warning). (Web Only Appendix lists all drugs with safety warnings and/or withdrawals.) A notice that one product, gatifloxacin, had been withdrawn from the market never appeared on the MedEffect web site and the withdrawal was only confirmed on the DPD web site. The median time to a first safety warning was 1094 days (interquartile range 551.8, 1812.5) and 778 to withdrawal (interquartile range 486.5, 1119.5).

Out of the 298 NAS approved from January 1, 2000 to March 31, 2012, 79 were biologics (60 no safety warnings and 19 with safety warnings) and 219 were traditional medications (175 no safety warnings and 44 with safety warnings). The therapeutic status of 336 NAS was determined from either the PMPRB or Prescrire evaluations. 305 were not significant therapeutic advances (232 no safety warnings and 73 safety warnings) and 31 were therapeutic advances (20 no safety warnings and 11 safety warnings). Of the 70 NAS where the therapeutic status could not be determined, 66 had no serious safety warnings and 4 had a warning; none were withdrawn from the market.

22 of the 31 NAS that were therapeutic advances received a priority review, whereas 67 of the 305 NAS that were not significant advances also had a priority review. Overall, the review status was 77.4% accurate in determining the therapeutic rating of the NAS.

1  
2  
3  
4  
5  
6 The Kaplan-Meier curves show that the probability of a traditional NAS acquiring a  
7  
8 serious safety warning and/or being withdrawn was 29.9% (95% CI, 21.8, 40.2) versus  
9  
10 27.3% (95% CI, 18.2, 39.7) for a NAS of biologic origin (Figure 1,  $p = 0.47$ , log-rank  
11  
12 test). For medications that were that significant therapeutic advances the probability was  
13  
14 40.2% (95% CI, 24.5, 60.9) versus 33.9% (95 CI, 26.4, 42.7) for those that were not  
15  
16 (Figure 2,  $p = 0.18$ , log-rank test).  
17  
18  
19  
20  
21

## 22 DISCUSSION

23  
24 The results of this study support both of the original hypotheses of no difference in safety  
25  
26 between traditional medications versus biologics and no difference between drugs with  
27  
28 significant therapeutic benefits versus those without. Other comparisons between groups  
29  
30 of drugs that have used safety warnings have similarly found no difference in postmarket  
31  
32 safety.(11)  
33  
34  
35  
36  
37  
38

39 The finding that the safety profile of NAS is the same regardless of the level of  
40  
41 therapeutic benefit is welcome news as it means that more benefits are not being traded  
42  
43 off against more harms. At the same time, it also calls into question the benefit:harm ratio  
44  
45 of the latter group of drugs as the benefits they offer are significantly lower whereas their  
46  
47 safety is the same. In this sample 90.8% (305/336) of drugs fell into this category.  
48  
49

50 Getting drugs with significant benefits to market quickly should be a priority and Health  
51  
52 Canada should investigate whether its ability to determine what type of review is most  
53  
54 appropriate for a NAS could be improved beyond its current 77.4% accuracy. Being  
55  
56  
57  
58  
59  
60

1  
2  
3 better able to determine the eventual therapeutic benefit could mean that more than 71%  
4 (22/31) of drugs with significant therapeutic benefits will receive a priority review while  
5  
6 at the same time having fewer than 22% (67/305) without significant therapeutic benefits  
7  
8 getting the same type of resource intensive review.  
9  
10  
11

12  
13  
14  
15 Knowing that biologics have the same safety profile as traditional medications is also  
16  
17 reassuring as it is quite likely that drug research and development will be increasingly  
18  
19 turning to biologics. This study showed that 27.3% of biologics eventually receive a  
20  
21 serious safety warning or have to be withdrawn from the market. This figure is virtually  
22  
23 the same as the 29% Kaplan-Meier estimate for a first safety-related regulatory action for  
24  
25 biologics approved in the US and the European Union between January 1995 and June  
26  
27 2008.(12)  
28  
29  
30  
31  
32  
33

34 This study has several limitations. One possible criticism is that there might be a  
35  
36 systematic difference in the frequency of adverse drug reaction (ADR) reporting  
37  
38 depending on the class of the drug so that, to take one scenario, ADRs might be  
39  
40 underreported for biologics compared to traditional drugs. While safety reports are  
41  
42 sometimes triggered by ADRs, Health Canada also utilizes other sources of information  
43  
44 in making its decision about issuing a serious safety warning.(13) The definition of a  
45  
46 serious safety warning was based on the way that Health Canada displayed the  
47  
48 information (bolded black print and/or boxed text) but the criteria that Health Canada  
49  
50 used to develop its safety warnings and the emphasis that it placed on any particular  
51  
52 safety issue are not known. There were inconsistencies in the Health Canada databases.  
53  
54  
55  
56  
57  
58  
59  
60

1  
2  
3 Some drugs identified as a NAS in the TPD annual reports were not called a NAS in the  
4  
5 Notice of Compliance Online Query web site. Other drugs listed in the annual reports  
6  
7 could not be found on the DPD web site. On-the-other hand, the information that  
8  
9  
10 gatifloxacin was no longer marketed in Canada was only found on the DPD web site. The  
11  
12 date on which a NAS receives a NOC is not necessarily the date on which the company  
13  
14 actually decides to market the drug and therefore the length of time the drug is available  
15  
16 before it receives a safety warning may be shorter than what is reported here. Finally, the  
17  
18 therapeutic value of 70 of the NAS could not be determined from the two sources  
19  
20 consulted.  
21  
22  
23  
24  
25

26  
27 Although this study relied primarily on Canadian data, its conclusions regarding the  
28  
29 postmarket safety profile of the four groups of drugs examined are likely to be  
30  
31 generalizable to other countries and regions (e.g., Australia, European Union, United  
32  
33 States) with similar drug regulatory agencies. The distinction between a drug derived  
34  
35 from traditional chemical synthesis and a biologic is independent of the regulatory  
36  
37 jurisdiction. The method used here to determine the therapeutic value of the products  
38  
39 relied on objective evaluations from two groups that did not have any conflicts of interest.  
40  
41  
42 Previous work has shown a moderate level of agreement between the therapeutic  
43  
44 evaluations from the PMPRB and Prescrire (14) making it reasonable to use Prescrire's  
45  
46 ratings for drugs that were not evaluated by the PMPRB.  
47  
48  
49  
50

51  
52  
53 One final question that this study raises is whether the current level of postmarket safety  
54  
55 is acceptable. Depending on the group of drugs being examined, between 27.3% to  
56  
57  
58  
59  
60



1  
2  
3 40.2% eventually received a serious safety warning or were withdrawn. This is a question  
4  
5 that can only be answered through a detailed examination of the way that Health Canada  
6  
7 reviews the clinical trial information that it receives from the pharmaceutical companies.  
8  
9 At present, Health Canada's treatment of this information as commercially confidential  
10  
11 precludes such an examination.(15)  
12  
13  
14  
15  
16  
17  
18  
19  
20  
21  
22  
23  
24  
25  
26  
27  
28  
29  
30  
31  
32  
33  
34  
35  
36  
37  
38  
39  
40  
41  
42  
43  
44  
45  
46  
47  
48  
49  
50  
51  
52  
53  
54  
55  
56  
57  
58  
59  
60

### **Acknowledgements**

Loes Knaapen commented on an earlier version of this manuscript.

### **Competing Interests**

In 2008 Joel Lexchin was an expert witness for the Canadian federal government in its defence against a lawsuit challenging the ban on direct-to-consumer advertising. In 2010 he was an expert witness for a law firm representing the family of a plaintiff who allegedly died from an adverse reaction from a product made by Allergan. He is currently on the Management Board of Healthy Skepticism Inc. and is the Chair of the Health Action International – Europe Association Board.

### **Funding**

There was no funding involved in the research or writing of this article.

## References

1. Collier R. Post-market drug surveillance projects developing slowly. CMAJ. 2010 April 29, 2010;182:E43.
2. Silversides A. Health Canada's investment in new post-market drug surveillance network a "pittance". CMAJ. 2008;179:412.
3. Wiktorowicz ME, Lexchin J, Moscou K, Silversides A, Eggertson L. Keeping an eye on prescription drugs...Keeping Canadians safe: active monitoring systems for drug safety and effectiveness in Canada and internationally. Toronto: Health Council of Canada, 2010.
4. Office of the Auditor General of Canada. Report of the Auditor General of Canada to the House of Commons. Chapter 4: regulating pharmaceutical drugs - Health Canada. Ottawa: 2011.
5. Lazarou J, Pomeranz BH, Corey PN. Incidence of adverse drug reactions in hospitalized patients: a meta-analysis of prospective studies JAMA. 1998; 279 1200-5.
6. Moore TJ, Cohen MR, Furberg CD. Serious adverse drug events reported to the Food and Drug Administration, 1998-2005. Archives of Internal Medicine. 2007;167 1752-9.
7. Lexchin J. Drug withdrawals from the Canadian market for safety reasons, 1963 - 2004. CMAJ. 2005;172:765-7.
8. IMS Health Canada. Top 50 Prescribed Medications\*, 2003. 2004.
9. Lexchin J. New drugs and safety: what happened to new active substances approved in Canada between 1995 and 2010? Archives of Internal Medicine. 2012;172:1680-1.

- 1  
2  
3  
4  
5  
6  
7  
8  
9  
10  
11  
12  
13  
14  
15  
16  
17  
18  
19  
20  
21  
22  
23  
24  
25  
26  
27  
28  
29  
30  
31  
32  
33  
34  
35  
36  
37  
38  
39  
40  
41  
42  
43  
44  
45  
46  
47  
48  
49  
50  
51  
52  
53  
54  
55  
56  
57  
58  
59  
60
10. Notice of compliance (NOC) database terminology Ottawa: Health Canada; 2010 [cited 2011 June 9]. Available from: [http://www.hc-sc.gc.ca/dhp-mps/prodpharma/notices-avis/noc-acc/term\\_noc\\_acc-eng.php](http://www.hc-sc.gc.ca/dhp-mps/prodpharma/notices-avis/noc-acc/term_noc_acc-eng.php).
  11. Arnardottir A, Hasijer-Ruskamp F, Straus S, Eichler H-G, de Graeff P, Mol P. Additional safety risk to exceptionally approved drugs in Europe. *British Journal of Clinical Pharmacology*. 2011;72:490-9.
  12. Giezen TJ, Mantel-Teeuwisse AK, Straus SMJM, Schellekens H, Leufkens HGM, Egberts ACG. Safety-related regulatory actions for biologicals approved in the United States and the European Union. *JAMA*. 2008;300:1887-96.
  13. MedEffect Canada. Health product vigilance framework: Health Canada; 2012 [cited 2013 October 16]. Available from: <http://www.hc-sc.gc.ca/dhp-mps/pubs/medeff/fs-if/2012-hpvf-cvps/index-eng.php>.
  14. Lexchin J. International comparison of assessments of drug innovation. *Health Policy*. 2012;105:221-5.
  15. Herder M. Unlocking Health Canada's cache of trade secrets: mandatory disclosure of clinical trial results. *CMAJ*. 2012;184:194-9.

Figure 1: Kaplan-Meier estimate of new active substance survival: traditional medications versus biologics

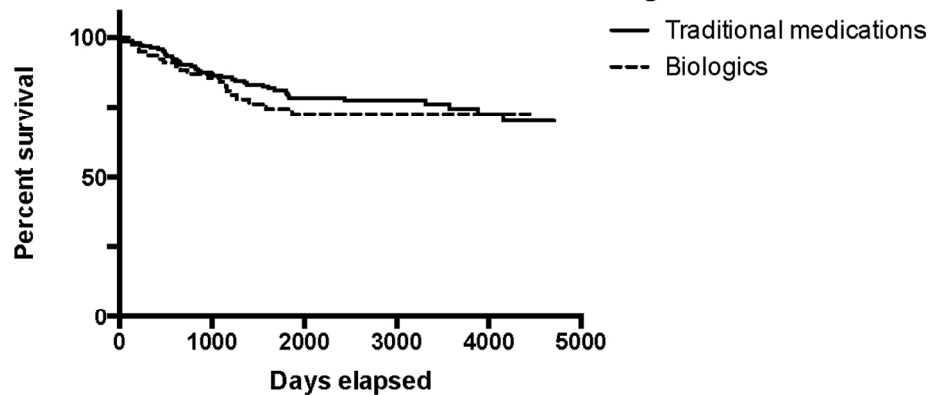

165x80mm (200 x 200 DPI)

er review only

1  
2  
3  
4  
5  
6  
7  
8  
9  
10  
11  
12  
13  
14  
15  
16  
17  
18  
19  
20  
21  
22  
23  
24  
25  
26  
27  
28  
29  
30  
31  
32  
33  
34  
35  
36  
37  
38  
39  
40  
41  
42  
43  
44  
45  
46  
47  
48  
49  
50  
51  
52  
53  
54  
55  
56  
57  
58  
59  
60

Figure 2: Kaplan-Meier estimate of new active substance survival: significant therapeutic advance versus no significant therapeutic advance

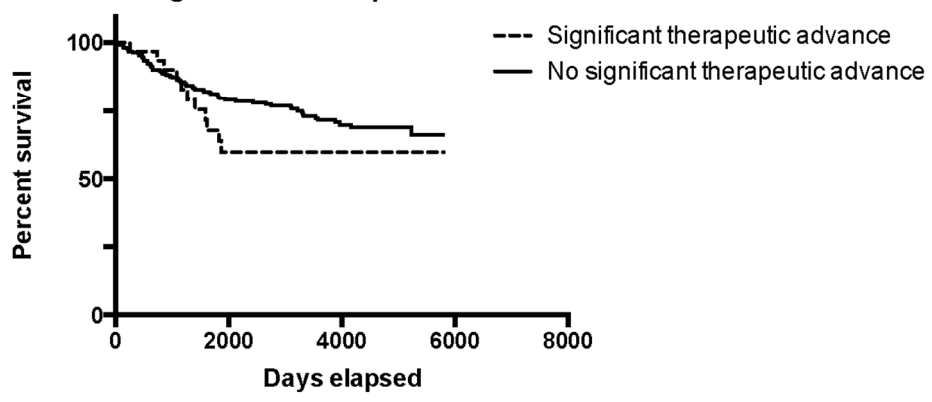

168x86mm (200 x 200 DPI)

For peer review only

1  
2  
3  
4  
5 **Web Only Appendix: Drugs With Serious Safety Warnings and/or Withdrawn From the Market**

6  
7  
8  
9  
10  
11  
12  
13  
14  
15  
16  
17  
18  
19  
20  
21  
22  
23  
24  
25  
26  
27  
28  
29  
30  
31  
32  
33  
34  
35  
36  
37  
38  
39  
40  
41  
42  
43  
44  
45  
46  
47  
48  
49

| Generic name | Brand name | Date of receipt of Notice Of Compliance | Date of first safety warning | Reason for warning                                                                       | Date of withdrawal from the market | Reason for withdrawal |
|--------------|------------|-----------------------------------------|------------------------------|------------------------------------------------------------------------------------------|------------------------------------|-----------------------|
| Abacavir     | Ziagen     | June 4, 1999                            | June 18, 2008                | Risk of cardiac events                                                                   |                                    |                       |
| Adalimumab   | Humira     | September 24, 2004                      | Feb. 2, 2005                 | Increased risk of hematologic events & increased risk infections when used with anakinra |                                    |                       |
| Alemtuzumab  | Mabcampath | November 30, 2005                       | November 18, 2008            | Infection related deaths                                                                 |                                    |                       |
| Anakinra     | Kineret    | May 24, 2002                            | December 17, 2002            | Higher incidence of serious infections when taken with etanercept                        |                                    |                       |
| Atomoxetine  | Strattera  | December 24, 2004                       | May 1, 2006                  | Cardiac related adverse events                                                           |                                    |                       |
| Belimumab    | Benlysta   | July 6, 2011                            | May 3, 2012                  | Severe and possibly fatal infusion and hypersensitivity reactions                        |                                    |                       |

1  
2  
3  
4  
5  
6  
7  
8  
9  
10  
11  
12  
13  
14  
15  
16  
17  
18  
19  
20  
21  
22  
23  
24  
25  
26  
27  
28  
29  
30  
31  
32  
33  
34  
35  
36  
37  
38  
39  
40  
41  
42  
43  
44  
45  
46  
47  
48  
49

|              |               |                   |                  |                                                                                 |                |                            |
|--------------|---------------|-------------------|------------------|---------------------------------------------------------------------------------|----------------|----------------------------|
| Bevacizumab  | Avastin       | September 9, 2005 | October 24, 2006 | Hypertensive encephalopathy & reversible posterior leukoencephalopathy syndrome |                |                            |
| Bupropion    | Wellbutrin SR | April 28, 1998    | July 3, 2001     | Reduction in risk of seizures and drug interactions                             |                |                            |
| Ceftobiprole | Zeftera       | June 26, 2008     |                  |                                                                                 | April 16, 2010 | Concerns re conduct trials |
| Celecoxib    | Celebrex      | April 14, 1999    | May 13, 2002     | Standard contraindications for NSAIDs added to Product Monograph                |                |                            |
| Cerivastatin | Baycol        | February 18, 1998 | July 16, 2001    | Rhabdomyolysis                                                                  | August 8, 2001 | Rhabdomyolysis             |
| Citalopram   | Celexa        | February 5, 1999  | May 26, 2004     | Risk of self harm                                                               |                |                            |
| Clopidrogel  | Plavix        | Oct. 7, 1998      | Aug. 14, 2009    | Use with PPIs can decrease effectiveness of clopidrogel                         |                |                            |



|    |                     |          |                  |                   |                                                                                                                                     |
|----|---------------------|----------|------------------|-------------------|-------------------------------------------------------------------------------------------------------------------------------------|
| 1  |                     |          |                  |                   |                                                                                                                                     |
| 2  |                     |          |                  |                   |                                                                                                                                     |
| 3  |                     |          |                  |                   |                                                                                                                                     |
| 4  |                     |          |                  |                   |                                                                                                                                     |
| 5  | Dabigatran          | Pradax   | June 10, 2008    | Mar. 16, 2012     | Assess renal function before using & while using; don't use in patients with hemodynamically significant rheumatic valvular disease |
| 6  |                     |          |                  |                   |                                                                                                                                     |
| 7  |                     |          |                  |                   |                                                                                                                                     |
| 8  |                     |          |                  |                   |                                                                                                                                     |
| 9  |                     |          |                  |                   |                                                                                                                                     |
| 10 |                     |          |                  |                   |                                                                                                                                     |
| 11 |                     |          |                  |                   |                                                                                                                                     |
| 12 |                     |          |                  |                   |                                                                                                                                     |
| 13 |                     |          |                  |                   |                                                                                                                                     |
| 14 | Daclizumab          | Zenaprax | January 4, 2000  | November 6, 2003  | Possible increase in mortality in cardiac transplant patients                                                                       |
| 15 |                     |          |                  |                   |                                                                                                                                     |
| 16 |                     |          |                  |                   |                                                                                                                                     |
| 17 |                     |          |                  |                   |                                                                                                                                     |
| 18 | Darbepoetin alpha   | Aranesp  | August 2, 2002   | November 25, 2005 | Antibody mediated pure red cell aplasia                                                                                             |
| 19 |                     |          |                  |                   |                                                                                                                                     |
| 20 |                     |          |                  |                   |                                                                                                                                     |
| 21 | Darunavir           | Prezista | July 28, 2006    | May 12, 2008      | Hepatotoxicity                                                                                                                      |
| 22 |                     |          |                  |                   |                                                                                                                                     |
| 23 | Dasatinib           | Sprycell | March 26, 2007   | August 26, 2011   | Pulmonary artery hypertension                                                                                                       |
| 24 |                     |          |                  |                   |                                                                                                                                     |
| 25 |                     |          |                  |                   |                                                                                                                                     |
| 26 | Deferasirox         | Exjade   | October 18, 2006 | March 9, 2007     | Acute renal failure & cytopenias                                                                                                    |
| 27 |                     |          |                  |                   |                                                                                                                                     |
| 28 |                     |          |                  |                   |                                                                                                                                     |
| 29 | Denosumab           | Prolia   | Aug. 6, 2010     | May 28, 2012      | Risk of severe symptomatic hypocalcemia (warning issued for Xgeva)                                                                  |
| 30 |                     |          |                  |                   |                                                                                                                                     |
| 31 |                     |          |                  |                   |                                                                                                                                     |
| 32 |                     |          |                  |                   |                                                                                                                                     |
| 33 |                     |          |                  |                   |                                                                                                                                     |
| 34 |                     |          |                  |                   |                                                                                                                                     |
| 35 | Dexamethylphenidate | Attenade | August 12, 2003  | May 1, 2006       | Cardiac related adverse events                                                                                                      |
| 36 |                     |          |                  |                   |                                                                                                                                     |
| 37 |                     |          |                  |                   |                                                                                                                                     |
| 38 |                     |          |                  |                   |                                                                                                                                     |
| 39 |                     |          |                  |                   |                                                                                                                                     |
| 40 |                     |          |                  |                   |                                                                                                                                     |
| 41 |                     |          |                  |                   |                                                                                                                                     |
| 42 |                     |          |                  |                   |                                                                                                                                     |
| 43 |                     |          |                  |                   |                                                                                                                                     |
| 44 |                     |          |                  |                   |                                                                                                                                     |
| 45 |                     |          |                  |                   |                                                                                                                                     |
| 46 |                     |          |                  |                   |                                                                                                                                     |
| 47 |                     |          |                  |                   |                                                                                                                                     |
| 48 |                     |          |                  |                   |                                                                                                                                     |
| 49 |                     |          |                  |                   |                                                                                                                                     |

1  
2  
3  
4  
5  
6  
7  
8  
9  
10  
11  
12  
13  
14  
15  
16  
17  
18  
19  
20  
21  
22  
23  
24  
25  
26  
27  
28  
29  
30  
31  
32  
33  
34  
35  
36  
37  
38  
39  
40  
41  
42  
43  
44  
45  
46  
47  
48  
49

|                  |         |                  |                   |                                                                                            |                  |                                            |
|------------------|---------|------------------|-------------------|--------------------------------------------------------------------------------------------|------------------|--------------------------------------------|
| Dolastetron      | Anzemet | May 21, 1997     | June 23, 2006     | Contraindicated in those under 18 for the prevention & treatment of post-operative nausea  |                  |                                            |
| Doripenem        | Doribax | Sept. 2, 2009    | Jan. 26, 2012     | Increased mortality compared to imipenem-cilastin                                          |                  |                                            |
| Dronedarone      | Multaq  | August 11, 2009  | March 10, 2011    | Hepatocellular liver injury                                                                |                  |                                            |
| Drotrecogin Alfa | Xigris  | January 31, 2003 | January 31, 2005  | Increased mortality in patients with single organ dysfunction & recent surgery             | October 25, 2011 | Failure to show benefit                    |
| Efalizumab       | Raptiva | October 24, 2005 | December 22, 2008 | Progressive multifocal leukoencephalopathy                                                 | Feb. 22, 2009    | Progressive multifocal leukoencephalopathy |
| Erlotinib        | Tarceva | July 7, 2005     | December 12, 2008 | Increased risk of death in patients with moderate hepatic impairment & corneal perforation |                  |                                            |
| Etanercept       | Enbrel  | December 1, 2000 | January 13, 2006  | Risk of hepatitis B virus infection                                                        |                  |                                            |

|    |                 |                             |                   |                   |                                                                              |               |                              |
|----|-----------------|-----------------------------|-------------------|-------------------|------------------------------------------------------------------------------|---------------|------------------------------|
| 1  |                 |                             |                   |                   |                                                                              |               |                              |
| 2  |                 |                             |                   |                   |                                                                              |               |                              |
| 3  |                 |                             |                   |                   |                                                                              |               |                              |
| 4  |                 |                             |                   |                   |                                                                              |               |                              |
| 5  | Etravirine      | Intelence                   | March 27, 2008    | October 15, 2009  | Severe skin & hypersensitivity reactions                                     |               |                              |
| 6  |                 |                             |                   |                   |                                                                              |               |                              |
| 7  |                 |                             |                   |                   |                                                                              |               |                              |
| 8  |                 |                             |                   |                   |                                                                              |               |                              |
| 9  | Ezetimibe       | Ezetrol                     | May 12, 2003      | Feb. 1, 2005      | Myalgia, rhabdomyolysis, hepatitis, pancreatitis & thrombocytopenia          |               |                              |
| 10 |                 |                             |                   |                   |                                                                              |               |                              |
| 11 |                 |                             |                   |                   |                                                                              |               |                              |
| 12 |                 |                             |                   |                   |                                                                              |               |                              |
| 13 |                 |                             |                   |                   |                                                                              |               |                              |
| 14 |                 |                             |                   |                   |                                                                              |               |                              |
| 15 | Formoterol      | Foradil dry powder capsules | March 6, 1997     | September 7, 2005 | Increased risk of asthma-related deaths in patients who also used salmeterol |               |                              |
| 16 |                 |                             |                   |                   |                                                                              |               |                              |
| 17 |                 |                             |                   |                   |                                                                              |               |                              |
| 18 |                 |                             |                   |                   |                                                                              |               |                              |
| 19 |                 |                             |                   |                   |                                                                              |               |                              |
| 20 |                 |                             |                   |                   |                                                                              |               |                              |
| 21 |                 |                             |                   |                   |                                                                              |               |                              |
| 22 | Fosamprenavir   | Telzir                      | December 10, 2004 | July 17, 2009     | Myocardial infarction                                                        |               |                              |
| 23 |                 |                             |                   |                   |                                                                              |               |                              |
| 24 | Gadoversetamide | Optimark                    | December 11, 2000 | January 8, 2010   | Nephrogenic systemic fibrosis                                                |               |                              |
| 25 |                 |                             |                   |                   |                                                                              |               |                              |
| 26 |                 |                             |                   |                   |                                                                              |               |                              |
| 27 | Galantamine     | Reminyl                     | July 31, 2001     | April 18, 2005    | Increase in mortality in patients with mild cognitive impairment             |               |                              |
| 28 |                 |                             |                   |                   |                                                                              |               |                              |
| 29 |                 |                             |                   |                   |                                                                              |               |                              |
| 30 |                 |                             |                   |                   |                                                                              |               |                              |
| 31 |                 |                             |                   |                   |                                                                              |               |                              |
| 32 | Gatifloxacin    | Tequin                      | January 9, 2001   | December 19, 2005 | Serious hypoglycemia and hyperglycemia                                       | June 29, 2006 | Glucose metabolism disorders |
| 33 |                 |                             |                   |                   |                                                                              |               |                              |
| 34 |                 |                             |                   |                   |                                                                              |               |                              |
| 35 |                 |                             |                   |                   |                                                                              |               |                              |
| 36 |                 |                             |                   |                   |                                                                              |               |                              |
| 37 |                 |                             |                   |                   |                                                                              |               |                              |
| 38 |                 |                             |                   |                   |                                                                              |               |                              |
| 39 |                 |                             |                   |                   |                                                                              |               |                              |
| 40 |                 |                             |                   |                   |                                                                              |               |                              |
| 41 |                 |                             |                   |                   |                                                                              |               |                              |
| 42 |                 |                             |                   |                   |                                                                              |               |                              |
| 43 |                 |                             |                   |                   |                                                                              |               |                              |
| 44 |                 |                             |                   |                   |                                                                              |               |                              |
| 45 |                 |                             |                   |                   |                                                                              |               |                              |
| 46 |                 |                             |                   |                   |                                                                              |               |                              |
| 47 |                 |                             |                   |                   |                                                                              |               |                              |
| 48 |                 |                             |                   |                   |                                                                              |               |                              |
| 49 |                 |                             |                   |                   |                                                                              |               |                              |

|    |                    |           |                    |                    |                                                                                         |                     |
|----|--------------------|-----------|--------------------|--------------------|-----------------------------------------------------------------------------------------|---------------------|
| 1  |                    |           |                    |                    |                                                                                         |                     |
| 2  |                    |           |                    |                    |                                                                                         |                     |
| 3  |                    |           |                    |                    |                                                                                         |                     |
| 4  |                    |           |                    |                    |                                                                                         |                     |
| 5  | Gefitinib          | Iressa    | December 17, 2003  | August 26, 2005    | Restricted use to patients whose tumours are EGFR expression status positive or unknown |                     |
| 6  |                    |           |                    |                    |                                                                                         |                     |
| 7  |                    |           |                    |                    |                                                                                         |                     |
| 8  |                    |           |                    |                    |                                                                                         |                     |
| 9  |                    |           |                    |                    |                                                                                         |                     |
| 10 |                    |           |                    |                    |                                                                                         |                     |
| 11 | Grepafloxacin      | Raxar     | April 9, 1998      |                    |                                                                                         | October 26, 1999    |
| 12 |                    |           |                    |                    |                                                                                         | Cardiac arrhythmias |
| 13 | Ibritumomab        | Zevalin   | May 10, 2005       | December 7, 2005   | Severe mucocutaneous reactions                                                          |                     |
| 14 |                    |           |                    |                    |                                                                                         |                     |
| 15 |                    |           |                    |                    |                                                                                         |                     |
| 16 |                    |           |                    |                    |                                                                                         |                     |
| 17 |                    |           |                    |                    |                                                                                         |                     |
| 18 | Imatinib           | Gleevec   | September 20, 2001 | September 21, 2006 | Significant decrease in left ventricular ejection failure and congestive heart failure  |                     |
| 19 |                    |           |                    |                    |                                                                                         |                     |
| 20 |                    |           |                    |                    |                                                                                         |                     |
| 21 |                    |           |                    |                    |                                                                                         |                     |
| 22 |                    |           |                    |                    |                                                                                         |                     |
| 23 |                    |           |                    |                    |                                                                                         |                     |
| 24 | Infliximab         | Remicade  | September 27, 2001 | November 29, 2004  | Risk of malignancies                                                                    |                     |
| 25 |                    |           |                    |                    |                                                                                         |                     |
| 26 | Infliximab         | Remicade  | June 6, 2001       | November 29, 2004  | Risk of malignancies                                                                    |                     |
| 27 |                    |           |                    |                    |                                                                                         |                     |
| 28 |                    |           |                    |                    |                                                                                         |                     |
| 29 | Interferon Beta-1A | Rebif     | February 5, 1998   | December 4, 2003   | Hepatotoxicity                                                                          |                     |
| 30 |                    |           |                    |                    |                                                                                         |                     |
| 31 |                    |           |                    |                    |                                                                                         |                     |
| 32 | Irinotecan         | Camptosar | July 4, 1997       | May 11, 2001       | Increased mortality in clinical trials                                                  |                     |
| 33 |                    |           |                    |                    |                                                                                         |                     |
| 34 |                    |           |                    |                    |                                                                                         |                     |
| 35 | Leflunomide        | Arava     | March 16, 2000     | May 4, 2001        | Hepatotoxicity                                                                          |                     |
| 36 |                    |           |                    |                    |                                                                                         |                     |
| 37 |                    |           |                    |                    |                                                                                         |                     |
| 38 | Levofloxacin       | Levaquin  | Nov. 14, 1997      | Mar. 9, 2012       | Worsening of symptoms of myasthenia gravis                                              |                     |
| 39 |                    |           |                    |                    |                                                                                         |                     |
| 40 |                    |           |                    |                    |                                                                                         |                     |
| 41 |                    |           |                    |                    |                                                                                         |                     |
| 42 |                    |           |                    |                    |                                                                                         |                     |
| 43 |                    |           |                    |                    |                                                                                         |                     |
| 44 |                    |           |                    |                    |                                                                                         |                     |
| 45 |                    |           |                    |                    |                                                                                         |                     |
| 46 |                    |           |                    |                    |                                                                                         |                     |
| 47 |                    |           |                    |                    |                                                                                         |                     |
| 48 |                    |           |                    |                    |                                                                                         |                     |
| 49 |                    |           |                    |                    |                                                                                         |                     |

|    |                        |           |            |           |                          |                           |
|----|------------------------|-----------|------------|-----------|--------------------------|---------------------------|
| 1  |                        |           |            |           |                          |                           |
| 2  |                        |           |            |           |                          |                           |
| 3  |                        |           |            |           |                          |                           |
| 4  |                        |           |            |           |                          |                           |
| 5  | Lumiracoxib            | Prexige   | November   |           |                          | October 3, Hepatotoxicity |
| 6  |                        |           | 2, 2006    |           |                          | 2007                      |
| 7  | Methylnatrexone        | Relistor  | March 28,  | July 28,  | Gastrointestinal         |                           |
| 8  |                        |           | 2008       | 2010      | perforation              |                           |
| 9  | Mirtazapine            | Remeron   | May 18,    | May 26,   | Risk of self harm        |                           |
| 10 |                        |           | 2001       | 2004      |                          |                           |
| 11 | Modafinil              | Alertec   | February   | December  | Serious rash, allergic   |                           |
| 12 |                        |           | 26, 1999   | 18, 2007  | reactions & mental       |                           |
| 13 |                        |           |            |           | problems                 |                           |
| 14 | Moroctocog alpha       | Refacto   | May 28,    | September | Lack of effect           |                           |
| 15 |                        |           | 2002       | 15, 2003  |                          |                           |
| 16 | Moxifloxacin           | Avelox    | Oct. 19,   | Mar. 9,   | Worsening of symptoms    |                           |
| 17 |                        |           | 2000       | 2012      | of myasthenia gravis     |                           |
| 18 | Natalizumab            | Tysabri   | September  | June 2,   | Liver injury &           |                           |
| 19 |                        |           | 28, 2006   | 2008      | hypersensitivity         |                           |
| 20 | Nevirapine             | Viramune  | September  | November  | Severe life-threatening  |                           |
| 21 |                        |           | 4, 1998    | 10, 2000  | & fatal hepatotoxicity   |                           |
| 22 | Norelgestromin/ethinyl | Evra      | August 20, | November  | Increased risk of venous |                           |
| 23 | estradiol              |           | 2002       | 21, 2006  | thromboembolism          |                           |
| 24 | Oxcarbazepine          | Trileptal | April 13,  | April 27, | Life-threatening         |                           |
| 25 |                        |           | 2000       | 2005      | dermatological reactions |                           |
| 26 |                        |           |            |           | & multi-organ            |                           |
| 27 |                        |           |            |           | hypersensitivity         |                           |
| 28 |                        |           |            |           |                          |                           |
| 29 |                        |           |            |           |                          |                           |
| 30 |                        |           |            |           |                          |                           |
| 31 |                        |           |            |           |                          |                           |
| 32 |                        |           |            |           |                          |                           |
| 33 |                        |           |            |           |                          |                           |
| 34 |                        |           |            |           |                          |                           |
| 35 |                        |           |            |           |                          |                           |
| 36 |                        |           |            |           |                          |                           |
| 37 |                        |           |            |           |                          |                           |
| 38 |                        |           |            |           |                          |                           |
| 39 |                        |           |            |           |                          |                           |
| 40 |                        |           |            |           |                          |                           |
| 41 |                        |           |            |           |                          |                           |
| 42 |                        |           |            |           |                          |                           |
| 43 |                        |           |            |           |                          |                           |
| 44 |                        |           |            |           |                          |                           |
| 45 |                        |           |            |           |                          |                           |
| 46 |                        |           |            |           |                          |                           |
| 47 |                        |           |            |           |                          |                           |
| 48 |                        |           |            |           |                          |                           |
| 49 |                        |           |            |           |                          |                           |

|    |               |           |                   |                  |                                                                                              |                                 |
|----|---------------|-----------|-------------------|------------------|----------------------------------------------------------------------------------------------|---------------------------------|
| 1  |               |           |                   |                  |                                                                                              |                                 |
| 2  |               |           |                   |                  |                                                                                              |                                 |
| 3  |               |           |                   |                  |                                                                                              |                                 |
| 4  |               |           |                   |                  |                                                                                              |                                 |
| 5  | Pegaptanib    | Macugen   | May 2, 2005       | January 12, 2006 | Hypersensitivity reaction                                                                    |                                 |
| 6  |               |           |                   |                  |                                                                                              |                                 |
| 7  | Pegvisomant   | Somavert  | October 17, 2005  | June 2, 2008     | Marked hepatic enzyme elevations (>10 times normal) with pegvisomant & somatostatin analogue |                                 |
| 8  |               |           |                   |                  |                                                                                              |                                 |
| 9  |               |           |                   |                  |                                                                                              |                                 |
| 10 |               |           |                   |                  |                                                                                              |                                 |
| 11 |               |           |                   |                  |                                                                                              |                                 |
| 12 |               |           |                   |                  |                                                                                              |                                 |
| 13 |               |           |                   |                  |                                                                                              |                                 |
| 14 |               |           |                   |                  |                                                                                              |                                 |
| 15 | Pioglitazone  | Actos     | August 17, 2000   | April 18, 2007   | Increased incidence of fractures in women                                                    |                                 |
| 16 |               |           |                   |                  |                                                                                              |                                 |
| 17 |               |           |                   |                  |                                                                                              |                                 |
| 18 |               |           |                   |                  |                                                                                              |                                 |
| 19 | Raloxifene    | Evista    | November 6, 1998  | May 18, 2006     | Increased mortality due to stroke                                                            |                                 |
| 20 |               |           |                   |                  |                                                                                              |                                 |
| 21 | Repaglinide   | Gluconorm | April 6, 1999     | July 17, 2003    | Should not be used in combination with gemfibrozil risk of severe and prolonged hypoglycemia |                                 |
| 22 |               |           |                   |                  |                                                                                              |                                 |
| 23 |               |           |                   |                  |                                                                                              |                                 |
| 24 |               |           |                   |                  |                                                                                              |                                 |
| 25 |               |           |                   |                  |                                                                                              |                                 |
| 26 |               |           |                   |                  |                                                                                              |                                 |
| 27 |               |           |                   |                  |                                                                                              |                                 |
| 28 |               |           |                   |                  |                                                                                              |                                 |
| 29 | Rituximab     | Rituxan   | March 17, 2000    | July 27, 2004    | Hepatitis B reactivation                                                                     |                                 |
| 30 |               |           |                   |                  |                                                                                              |                                 |
| 31 |               |           |                   |                  |                                                                                              |                                 |
| 32 | Rofecoxib     | Vioxx     | October 25, 1999  | April 15, 2002   | Increase in cardiovascular risk                                                              | September 30, 2004              |
| 33 |               |           |                   |                  |                                                                                              | Increased cardiovascular events |
| 34 |               |           |                   |                  |                                                                                              |                                 |
| 35 |               |           |                   |                  |                                                                                              |                                 |
| 36 | Rosiglitazone | Avandia   | March 21, 2000    | November 9, 2010 | Restrictions on use due to cardiac safety                                                    |                                 |
| 37 |               |           |                   |                  |                                                                                              |                                 |
| 38 |               |           |                   |                  |                                                                                              |                                 |
| 39 | Rosuvastatin  | Crestor   | February 18, 2003 | June 15, 2004    | Rhabdomyolysis                                                                               |                                 |
| 40 |               |           |                   |                  |                                                                                              |                                 |
| 41 |               |           |                   |                  |                                                                                              |                                 |
| 42 |               |           |                   |                  |                                                                                              |                                 |
| 43 |               |           |                   |                  |                                                                                              |                                 |
| 44 |               |           |                   |                  |                                                                                              |                                 |
| 45 |               |           |                   |                  |                                                                                              |                                 |
| 46 |               |           |                   |                  |                                                                                              |                                 |
| 47 |               |           |                   |                  |                                                                                              |                                 |
| 48 |               |           |                   |                  |                                                                                              |                                 |
| 49 |               |           |                   |                  |                                                                                              |                                 |

|    |               |          |            |           |                          |            |                |
|----|---------------|----------|------------|-----------|--------------------------|------------|----------------|
| 1  |               |          |            |           |                          |            |                |
| 2  |               |          |            |           |                          |            |                |
| 3  |               |          |            |           |                          |            |                |
| 4  |               |          |            |           |                          |            |                |
| 5  | Sibutramine   | Meridia  | December   |           |                          | October 8, | Serious        |
| 6  |               |          | 28, 2000   |           |                          | 2010       | cardiovascular |
| 7  |               |          |            |           |                          |            | events         |
| 8  |               |          |            |           |                          |            |                |
| 9  | Sildenafil    | Viagra   | March 8,   | June 19,  | Serious visual           |            |                |
| 10 |               |          | 1999       | 2006      | disturbances             |            |                |
| 11 | Sirolimus     | Rapamune | January 5, | May 14,   | Increase in mortality,   |            |                |
| 12 |               |          | 2001       | 2002      | graft loss & hepatic     |            |                |
| 13 |               |          |            |           | artery thrombosis when   |            |                |
| 14 |               |          |            |           | used in conjunction with |            |                |
| 15 |               |          |            |           | tacrolimus               |            |                |
| 16 |               |          |            |           |                          |            |                |
| 17 |               |          |            |           |                          |            |                |
| 18 |               |          |            |           |                          |            |                |
| 19 | Sitaxsentan   | Thelin   | May 30,    | July 9,   | Hepatotoxicity, risks to | December   | Hepatotoxicity |
| 20 |               |          | 2007       | 2007      | fetus & important drug-  | 15, 2010   |                |
| 21 |               |          |            |           | drug interactions        |            |                |
| 22 |               |          |            |           |                          |            |                |
| 23 |               |          |            |           |                          |            |                |
| 24 | Tadalafil     | Cialis   | September  | June 19,  | Serious visual           |            |                |
| 25 |               |          | 17, 2003   | 2006      | disturbances             |            |                |
| 26 | Tegaserod     | Zelnorm  | March 12,  | April 28, | Diarrhoea & ischemic     | March 30,  | Cardiovascular |
| 27 |               |          | 2002       | 2004      | colitis                  | 2007       | events         |
| 28 |               |          |            |           |                          |            |                |
| 29 | Telbivudine   | Sebivo   | November   | March 7,  | Risk of peripheral       |            |                |
| 30 |               |          | 28, 2006   | 2008      | neuropathy with          |            |                |
| 31 |               |          |            |           | telbivudine & interferon |            |                |
| 32 |               |          |            |           |                          |            |                |
| 33 |               |          |            |           |                          |            |                |
| 34 |               |          |            |           |                          |            |                |
| 35 | Telithromycin | Ketek    | May 28,    | September | Hepatic events,          |            |                |
| 36 |               |          | 2003       | 29, 2006  | aggravation of           |            |                |
| 37 |               |          |            |           | myasthenia gravis &      |            |                |
| 38 |               |          |            |           | syncope                  |            |                |
| 39 |               |          |            |           |                          |            |                |
| 40 |               |          |            |           |                          |            |                |
| 41 |               |          |            |           |                          |            |                |
| 42 |               |          |            |           |                          |            |                |
| 43 |               |          |            |           |                          |            |                |
| 44 |               |          |            |           |                          |            |                |
| 45 |               |          |            |           |                          |            |                |
| 46 |               |          |            |           |                          |            |                |
| 47 |               |          |            |           |                          |            |                |
| 48 |               |          |            |           |                          |            |                |
| 49 |               |          |            |           |                          |            |                |

1  
2  
3  
4  
5  
6  
7  
8  
9  
10  
11  
12  
13  
14  
15  
16  
17  
18  
19  
20  
21  
22  
23  
24  
25  
26  
27  
28  
29  
30  
31  
32  
33  
34  
35  
36  
37  
38  
39  
40  
41  
42  
43  
44  
45  
46  
47  
48  
49

|               |                  |                   |                    |                                                                                                                   |                                     |
|---------------|------------------|-------------------|--------------------|-------------------------------------------------------------------------------------------------------------------|-------------------------------------|
| Temsirolimus  | Torisel          | December 21, 2007 | August 6, 2008     | Hypersensitivity/infusion reactions                                                                               |                                     |
| Tenofovir     | Viread           | Mar. 18, 2003     | June 9, 2005       | Co-administration with didanosine and either efavirenz or nevirapine can lead to high rate of virological failure |                                     |
| Tipranavir    | Aptivus          | November 21, 2005 | June 29, 2006      | Intracranial hemorrhage                                                                                           |                                     |
| Tocilizumab   | Actemra          | April 30, 2010    | September 13, 2010 | Fatal anaphylaxis                                                                                                 |                                     |
| Tolcapone     | Tasmar           | October 8, 1997   |                    |                                                                                                                   | November 20, 1998<br>Hepatotoxicity |
| Topiramate    | Topamax          | March 6, 1997     | September 13, 2001 | Acute myopia & secondary angle closure glaucoma                                                                   |                                     |
| Trastuzumab   | Herceptin        | Aug. 13, 1999     | Apr. 21, 2009      | Oligohydramnios                                                                                                   |                                     |
| Troglitazone  | Rezulin          | May 9, 1997       |                    |                                                                                                                   | March 15, 2000<br>Hepatotoxicity    |
| Trovafloxacin | Trovan (tablets) | December 4, 1998  |                    |                                                                                                                   | November 22, 2001<br>Hepatotoxicity |
| Valdecoxib    | Bextra           | December 11, 2002 | December 31, 2002  | Serious skin reactions                                                                                            | April 21, 2005<br>Skin reactions    |



|    |                 |          |             |            |                          |
|----|-----------------|----------|-------------|------------|--------------------------|
| 1  |                 |          |             |            |                          |
| 2  |                 |          |             |            |                          |
| 3  |                 |          |             |            |                          |
| 4  |                 |          |             |            |                          |
| 5  | Vandetanib      | Caprelsa | Jan. 12,    | Feb. 13,   | QTc                      |
| 6  |                 |          | 2012        | 2012       | prolongation, Torsade de |
| 7  |                 |          |             |            | Pointes & sudden death   |
| 8  |                 |          |             |            |                          |
| 9  |                 |          |             |            |                          |
| 10 | Vardenafil      | Levitra  | March 17,   | June 19,   | Serious visual           |
| 11 |                 |          | 2004        | 2006       | disturbances             |
| 12 | Varenicline     | Champix  | January 24, | June 13,   | Serious neuropsychiatric |
| 13 |                 |          | 2007        | 2008       | adverse events           |
| 14 |                 |          |             |            |                          |
| 15 |                 |          |             |            |                          |
| 16 | Zafirlukast     | Accolate | October 21, | October 7, | Hepatotoxicity           |
| 17 |                 |          | 1997        | 2002       |                          |
| 18 |                 |          |             |            |                          |
| 19 | Zoledronic acid | Zometa   | August 21,  | August 9,  | Clinically significant   |
| 20 |                 |          | 2000        | 2005       | deterioration in renal   |
| 21 |                 |          |             |            | function                 |
| 22 |                 |          |             |            |                          |
| 23 |                 |          |             |            |                          |
| 24 |                 |          |             |            |                          |
| 25 |                 |          |             |            |                          |
| 26 |                 |          |             |            |                          |
| 27 |                 |          |             |            |                          |
| 28 |                 |          |             |            |                          |
| 29 |                 |          |             |            |                          |
| 30 |                 |          |             |            |                          |
| 31 |                 |          |             |            |                          |
| 32 |                 |          |             |            |                          |
| 33 |                 |          |             |            |                          |
| 34 |                 |          |             |            |                          |
| 35 |                 |          |             |            |                          |
| 36 |                 |          |             |            |                          |
| 37 |                 |          |             |            |                          |
| 38 |                 |          |             |            |                          |
| 39 |                 |          |             |            |                          |
| 40 |                 |          |             |            |                          |
| 41 |                 |          |             |            |                          |
| 42 |                 |          |             |            |                          |
| 43 |                 |          |             |            |                          |
| 44 |                 |          |             |            |                          |
| 45 |                 |          |             |            |                          |
| 46 |                 |          |             |            |                          |
| 47 |                 |          |             |            |                          |
| 48 |                 |          |             |            |                          |
| 49 |                 |          |             |            |                          |

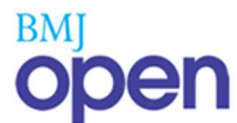

**Postmarket Safety in Canada: Are Significant Therapeutic Advances and Biologics Less Safe Than Other Drugs? A Cohort Study**

|                                 |                                                                                                                   |
|---------------------------------|-------------------------------------------------------------------------------------------------------------------|
| Journal:                        | <i>BMJ Open</i>                                                                                                   |
| Manuscript ID:                  | bmjopen-2013-004289.R1                                                                                            |
| Article Type:                   | Research                                                                                                          |
| Date Submitted by the Author:   | 27-Dec-2013                                                                                                       |
| Complete List of Authors:       | Lexchin, Joel; York University, School of Health Policy & Management                                              |
| <b>Primary Subject Heading</b>: | Health policy                                                                                                     |
| Secondary Subject Heading:      | Pharmacology and therapeutics                                                                                     |
| Keywords:                       | CLINICAL PHARMACOLOGY, Health policy < HEALTH SERVICES ADMINISTRATION & MANAGEMENT, Adverse events < THERAPEUTICS |
|                                 |                                                                                                                   |

SCHOLARONE™  
Manuscripts

1  
2  
3 **Postmarket Safety in Canada: Are Significant Therapeutic Advances and Biologics**  
4  
5 **Less Safe Than Other Drugs? A Cohort Study**  
6  
7

8 Joel Lexchin

9  
10 Professor, School of Health Policy and Management

11  
12 York University

13  
14 *and*

15  
16 Emergency Physician

17  
18 University Health Network

19  
20 *and*

21  
22 Associate Professor

23  
24 Department of Family and Community Medicine

25  
26 University of Toronto

27  
28 Toronto, Ontario

29  
30 Correspondence:

31  
32 Joel Lexchin MD

33  
34 School of Health Policy and Management

35  
36 York University

37  
38 4700 Keele St.

39  
40 Toronto, ON M3J 1P3

41  
42 Tel: 416-736-2100 x 22119

43  
44 Fax: 416-736-5227

45  
46 E mail: [jlexchin@yorku.ca](mailto:jlexchin@yorku.ca)

1  
2  
3 **Key words:** biologics, Canada, drug safety, small molecule, therapeutic  
4  
5  
6 potential

7  
8 **Word count:** 2971  
9  
10  
11  
12  
13  
14  
15  
16  
17  
18  
19  
20  
21  
22  
23  
24  
25  
26  
27  
28  
29  
30  
31  
32  
33  
34  
35  
36  
37  
38  
39  
40  
41  
42  
43  
44  
45  
46  
47  
48  
49  
50  
51  
52  
53  
54  
55  
56  
57  
58  
59  
60

For peer review only

## ABSTRACT

### Objectives

Examine the probability of new active substances (NAS) approved in Canada between January 1, 1997 and March 31, 2012 acquiring a serious postmarket safety warning.

### Design

Cohort study.

### Data sources

Annual reports of the Therapeutic Products Directorate and the Biologic and Genetic Therapies Directorate; evaluations of therapeutic innovation from Patented Medicine Prices Review Board and Prescrire International; MedEffect Canada web site.

### Interventions

Postmarket regulatory safety warning or withdrawal from market due to safety reasons.

### Primary and secondary outcome measures

Compare the probability of acquiring a postmarket safety warning in Canada in four different groups of drugs: 1) traditional medications versus biologics; 2) medications that offer significant new therapeutic benefits versus those that do not. Determine how well the type of review that a NAS received from Health Canada predicted the product's ultimate therapeutic value.

### Results

The probability of a traditional NAS acquiring a serious safety warning and/or being withdrawn was 29.9% (95% CI, 21.8, 40.2) versus 27.3% (95% CI, 18.2, 39.7) for a NAS of biologic origin ( $p = 0.47$ , log-rank test). For medications that were that significant

1  
2  
3 therapeutic advances the probability was 40.2% (95% CI, 24.5, 60.9) versus 33.9% (95  
4  
5  
6 CI, 26.4, 42.7) for those that were not ( $p = 0.18$ , log-rank test). Health Canada was 77.4%  
7  
8 accurate in predicting the therapeutic importance of a NAS.  
9

## 10 **Conclusions**

11  
12 There is no difference in postmarket regulatory safety action between traditional  
13  
14 medications and biologics and no difference between drugs with significant therapeutic  
15  
16 benefits and those without. Although these results draw on Canadian data they are likely  
17  
18 to be relevant internationally. Further research should assess whether the current level of  
19  
20 postmarket regulatory safety warnings is acceptable.  
21  
22  
23  
24  
25  
26  
27  
28  
29  
30  
31  
32  
33  
34  
35  
36  
37  
38  
39  
40  
41  
42  
43  
44  
45  
46  
47  
48  
49  
50  
51  
52  
53  
54  
55  
56  
57  
58  
59  
60

### Strengths and limitations of this study

- Systematic study of the postmarket regulatory safety warnings comparing groups of drugs: biologics versus traditional medicines and drugs with significant therapeutic advances versus drugs without significant therapeutic advances
- Comparison of premarket regulatory evaluation of therapeutic advance with postmarket evaluation
- Unclear what criteria Health Canada uses to decide to issue serious safety warnings
- Unknown date on which drug actually marketed as opposed to date approved
- Postmarket therapeutic evaluation of all new drugs could not be determined
- Presence of a postmarket safety warnings do not necessarily equate with the overall safety of a drug

## INTRODUCTION

Drug safety is becoming a topic of increasing concern in Canada. In July 2008, the federal government officially launched the Drug Safety and Effectiveness Network (DSEN) designed to connect researchers throughout Canada in a virtual network to conduct post-market drug research (1) and stimulate research to study the impact of drug use in the real-world setting.(2) In 2010, the Health Council of Canada released a discussion paper that drew on international best practices for recommendations about how Canada could improve its developing system of active pharmacosurveillance.(3) In 2011, the Auditor General reported that Health Canada is slow to assess potential safety issues and can take more than two years to provide Canadians with new safety information.(4) Most recently, legislation has been introduced that would give Health Canada the power to order additional safety testing for drugs already on the market.(5)

The increased focus on drug safety comes from a number of directions. In the United States (US), adverse drug reactions (ADRs) are estimated to result in between 76,000 and 137,000 fatalities per year, making ADRs the fourth to sixth leading annual cause of death.(6) Similarly, the Institute for Safe Medication Practices puts the number of annual deaths in the US at 128,000 based on reports to the Food and Drug Administration.(7) Since the Lazarou et al estimate was made in the late 1990s, reported serious adverse drug events increased 2.6-fold from 1998 to 2005 and fatal adverse drug events increased 2.7-fold during the same period while the total number of outpatient prescriptions went up by only 40%.(8) While there are relatively few drugs withdrawn from the market for safety reasons (9) large numbers of people have been exposed to some of these products.



1  
2  
3 In 2003, the year before rofecoxib (Vioxx®) was removed from the market it was the 10<sup>th</sup>  
4 most frequently prescribed medication in Canada.(10)  
5  
6  
7  
8  
9

10 A recent analysis of drug safety in Canada found that almost 1 in 4 new active substances  
11 approved (NAS) between 1995 and 2010 either had a serious safety warning or were  
12 removed from the market for safety reasons. (A NAS is a molecule never previously  
13 marketed in any form in Canada. This designation is given to all molecules meeting the  
14 definition and therefore should not be seen as creating a division between “new” and  
15 “old” drugs.) This figure increased to more than 1 in 3 for products that received a  
16 priority review, i.e., products that Health Canada felt might provide an effective treatment  
17 of a disease for which no drug is presently marketed or a significant increase in efficacy  
18 and/or significant decrease in risk over existing therapies.(11) Priority reviews have a  
19 timeline of 180 days versus the standard timeline of 300 days.(12)  
20  
21  
22  
23  
24  
25  
26  
27  
28  
29  
30  
31  
32  
33  
34  
35

36 This study compares postmarket regulatory safety action in four groups of drugs: 1)  
37 traditional medications (those derived from chemical manufacturing) and biologics; 2)  
38 medications that offer significant new therapeutic benefits and those that do not.  
39  
40 Biologics are large molecules synthesized from living organisms and typically  
41 administered intravenously. As such they may have a significantly different safety profile  
42 compared to traditional small molecule medications that come from chemical synthesis  
43 and are usually ingested orally. Regulators may be willing to approve drugs that offer  
44 significant therapeutic advances with more uncertainty about their safety compared to  
45 drugs that are not a significant therapeutic advance.  
46  
47  
48  
49  
50  
51  
52  
53  
54  
55  
56  
57  
58  
59  
60

1  
2  
3  
4  
5  
6 Specifically, this study attempts to reject the following two null hypotheses: 1) there is no  
7  
8 difference in the postmarket safety profile of traditional versus biologic medications, 2)  
9  
10 there is no difference in the postmarket safety profile of drugs with significant therapeutic  
11  
12 advances versus those without. A secondary objective was to determine how well the  
13  
14 type of review that a NAS received from Health Canada predicted the product's ultimate  
15  
16 therapeutic value.  
17  
18  
19  
20  
21

## 22 **METHODS**

23  
24 A list of NAS approved between January 1, 1997 and March 31, 2012 was compiled from  
25  
26 the annual reports of the Therapeutic Products Directorate (TPD) and the Biologic and  
27  
28 Genetic Therapies Directorate (BGTD) (henceforth collectively referred to as the TPD) -  
29  
30 available by directly contacting the directorates at <[publications@hc-sc.gc.ca](mailto:publications@hc-sc.gc.ca)>. For each  
31  
32 product the following information was abstracted: generic name, brand name,  
33  
34 manufacturer, indication, date of Notice of Compliance (NOC – marketing authorization),  
35  
36 type of review (priority or standard) and type of product (traditional or biologic). The  
37  
38 TPD annual reports only gave the type of product (traditional or biologic) from 2000  
39  
40 onwards.  
41  
42  
43  
44  
45  
46  
47

48 Two sources were used to determine the therapeutic value of the NAS: the annual reports  
49  
50 of the Patented Medicine Prices Review Board (PMPRB) available on-line from 2003 to  
51  
52 2011 at <<http://www.pmprb-cepmb.gc.ca/english/View.asp?x=91>> and for previous years  
53  
54 by directly contacting the PMPRB at <[pmprb@pmprb-cepmb.gc.ca](mailto:pmprb@pmprb-cepmb.gc.ca)> and the on-line  
55  
56  
57  
58  
59  
60

1  
2  
3 reviews published by Prescrire International up to February 14, 2013

4  
5 <<http://english.prescrire.org/en/>>. These sources were chosen because their evaluations  
6  
7  
8 are unambiguous and therefore do not require any subjective interpretation and they are  
9  
10 both available in English.  
11

12  
13  
14  
15 The PMPRB is a federal agency that is responsible for calculating the maximum  
16  
17 introductory price for all new patented medications introduced into the Canadian market.  
18  
19 As part of the process of determining the price, its Human Drug Advisory Panel  
20  
21 determines the therapeutic value of each product it reviews. Up until the end of 2009  
22  
23 NAS were classified into two groups: 1) breakthroughs or substantial improvement and  
24  
25 2) moderate, little or no therapeutic improvement. Since 2010 NAS are classified as  
26  
27 breakthrough or substantial improvement, moderate improvement (primary or secondary)  
28  
29 and slight or no improvement. For the purpose of this study products that were deemed  
30  
31 breakthrough and substantial improvement were termed “significant therapeutic advance”  
32  
33 and products in other groups were termed “no therapeutic advance”. The change in the  
34  
35 PMPRB system starting in 2010 was meant to provide a finer gradation in the “moderate,  
36  
37 little or no therapeutic improvement” group and as such did not affect the dichotomous  
38  
39 classification used here between “significant therapeutic advance” and “no therapeutic  
40  
41 advance”. In some cases the PMPRB annual reports indicated that the therapeutic value  
42  
43 of the product was still being determined and in those cases the PMPRB was contacted  
44  
45 directly to determine the final classification.  
46  
47  
48  
49  
50  
51

52  
53  
54  
55 If the PMPRB had not considered a product then its therapeutic value was determined  
56  
57  
58  
59  
60

1  
2  
3 from Prescrire evaluations. Prescrire rates products using the following categories: bravo  
4 (major therapeutic innovation in an area where previously no treatment was available); a  
5  
6 (major therapeutic innovation in an area where previously no treatment was available); a  
7  
8 real advance (important therapeutic innovation but has limitations); offers an advantage  
9  
10 (some value but does not fundamentally change the present therapeutic practice);  
11  
12 possibly helpful (minimal additional value and should not change prescribing habits  
13  
14 except in rare circumstances); nothing new (may be new molecule but is superfluous  
15  
16 because does not add to clinical possibilities offered by previously available products);  
17  
18 not acceptable (without evident benefit but with potential or real disadvantages);  
19  
20 judgement reserved (decision postponed until better data and more thorough evaluation).  
21  
22  
23

24 The first 3 Prescrire categories were termed significant therapeutic advance and the other  
25  
26 Prescrire categories (except judgement reserved) were termed no therapeutic advance.  
27

28  
29 Previous work has shown a moderate level of agreement between the therapeutic  
30  
31 evaluations from the PMPRB and Prescrire.(13)  
32  
33  
34  
35

36  
37 Safety warnings and drug withdrawals for the period January 1, 1997 to December 31,  
38  
39 2012 were identified through advisories for health professionals on the MedEffect  
40  
41 Canada web site <[http://www.hc-sc.gc.ca/dhp-mps/medeff/advisories-avis/prof/index-  
44  
45 eng.php](http://www.hc-sc.gc.ca/dhp-mps/medeff/advisories-avis/prof/index-<br/>42<br/>43 eng.php)>. For each safety advisory or notice of withdrawal of a product, the date and  
46  
47 reason was recorded. All serious safety advisories (those using bolded black print or  
48  
49 boxed warnings) were included except for those dealing with the withdrawal of a specific  
50  
51 batch or lot number due to manufacturing problems or those issued because of misuse of  
52  
53 a drug (e.g., an unapproved use) or medication errors (e.g., a warning about remembering  
54  
55 to remove a transdermal patch before applying a second one). When necessary, notices  
56  
57  
58  
59  
60

1  
2  
3 on the MedEffect web site were supplemented by searching on the product name in the  
4 Drug Product Database (DPD) <<http://webprod3.hc-sc.gc.ca/dpd-bdpp/index-eng.jsp>>.

5  
6  
7  
8 The DPD contains product specific information on drugs approved for use in Canada and  
9  
10 all products discontinued since 1996.

11  
12  
13  
14  
15 Troglitazone was approved but never marketed in Canada because of a dispute about its  
16  
17 introductory price. There was no information about revocation of its NOC on the  
18  
19 MedEffect web site. The drug was removed from the US market in March 2000 and  
20  
21 March 15, 2000 was arbitrarily used as its withdrawal date in Canada. It was retained in  
22  
23 the analysis because it was a product that was approved and then later shown to have side  
24  
25 effects serious enough that it needed to be withdrawn. The TPD annual reports list  
26  
27 infliximab as two separate NAS since it was approved for two different indications –  
28  
29 Crohn's disease and rheumatoid arthritis and therefore it is included twice.  
30  
31  
32  
33  
34  
35

36  
37 The time between receipt of a NOC and a safety warning and/or withdrawal from the  
38  
39 market was calculated in days. If a drug received more than one serious safety warning  
40  
41 only the time to the first warning was used. Medians are reported for the time from NOC  
42  
43 to serious safety warnings and/or withdrawal as these values are not normally distributed  
44  
45 (Shapiro-Wilk test). Kaplan-Meier survival curves were calculated separately for the  
46  
47 following comparisons: a) biologic versus traditional NAS and b) NAS that were  
48  
49 therapeutic advances versus those that were not.  
50  
51  
52  
53  
54

55 Health Canada gives a shorter priority review to drugs that provide a significant increase  
56  
57  
58  
59  
60

1  
2  
3 in efficacy or a significant decrease in side effects compared to other available agents for  
4 a serious, life-threatening or severely debilitating illness or condition, i.e., drugs that  
5 Health Canada judges as significant therapeutic gains.(12) Health Canada's accuracy in  
6 evaluating a NAS's therapeutic benefit was determined by comparing the review status  
7 given to the drug (priority versus standard) with the therapeutic evaluation from the  
8 PMPRB or Prescrire.  
9  
10  
11  
12  
13  
14  
15  
16  
17  
18  
19

20 There were no power calculations as the entire population of NAS was evaluated rather  
21 than just a sample. Calculations were done using Excel 2011 for Macintosh (Microsoft)  
22 and Prism (GraphPad Software).  
23  
24  
25  
26  
27  
28

## 29 **RESULTS**

30  
31 406 NAS were approved from January 1, 1997 to March 31, 2012. 87 (21.4%) were  
32 subject to either a serious safety warning and/or were withdrawn for safety reasons: 72  
33 (17.7%) had only serious safety warnings and 15 (3.7%) were withdrawn (8 had safety  
34 warnings first and 7 were withdrawn without any prior safety warning). (Web Only  
35 Appendix lists all drugs with safety warnings and/or withdrawals.) A notice that one  
36 product, gatifloxacin, had been withdrawn from the market never appeared on the  
37 MedEffect web site and the withdrawal was only confirmed on the DPD web site. The  
38 median time to a first safety warning was 1094 days (interquartile range 551.8, 1812.5)  
39 and 778 to withdrawal (interquartile range 486.5, 1119.5).  
40  
41  
42  
43  
44  
45  
46  
47  
48  
49  
50  
51  
52  
53  
54  
55  
56  
57  
58  
59  
60

1  
2  
3 Out of the 298 NAS approved from January 1, 2000 to March 31, 2012, 79 were  
4  
5 biologics (60 no safety warnings and 19 with safety warnings) and 219 were traditional  
6  
7 medications (175 no safety warnings and 44 with safety warnings). The therapeutic status  
8  
9 of 336 NAS was determined from either the PMPRB (296 NAS) or Prescrire (40 NAS)  
10  
11 evaluations. 305 were not significant therapeutic advances (232 no safety warnings and  
12  
13 73 safety warnings) and 31 were therapeutic advances (20 no safety warnings and 11  
14  
15 safety warnings). Of the 70 NAS where the therapeutic status could not be determined, 66  
16  
17 had no serious safety warnings and 4 had a warning; none were withdrawn from the  
18  
19 market.  
20  
21  
22  
23  
24  
25  
26

27 22 of the 31 NAS that were therapeutic advances received a priority review, whereas 67  
28  
29 of the 305 NAS that were not significant advances also had a priority review. Overall, the  
30  
31 review status was 77.4% accurate in determining the therapeutic rating of the NAS.  
32  
33  
34  
35

36 The Kaplan-Meier curves show that the probability of a traditional NAS acquiring a  
37  
38 serious safety warning and/or being withdrawn was 29.9% (95% CI, 21.8, 40.2) versus  
39  
40 27.3% (95% CI, 18.2, 39.7) for a NAS of biologic origin (Figure 1,  $p = 0.47$ , log-rank  
41  
42 test). For medications that were that significant therapeutic advances the probability was  
43  
44 40.2% (95% CI, 24.5, 60.9) versus 33.9% (95 CI, 26.4, 42.7) for those that were not  
45  
46 (Figure 2,  $p = 0.18$ , log-rank test).  
47  
48  
49  
50  
51  
52

## 53 DISCUSSION

54  
55 The results of this study support the null hypotheses in both cases of no difference in  
56  
57  
58  
59  
60

1  
2  
3 safety warnings between traditional medications versus biologics and no difference  
4  
5 between drugs with significant therapeutic benefits versus those without. Other  
6  
7 comparisons between groups of drugs that have used safety warnings have similarly  
8  
9 found no difference in postmarket safety.(14)  
10  
11  
12  
13  
14

15 The finding that there was no difference in the probability of acquiring a postmarket  
16  
17 safety warning for NAS regardless of their level of therapeutic benefit is welcome news  
18  
19 as it is one indication that more benefits are not being traded off against more harms. At  
20  
21 the same time, it also calls into question the benefit:harm ratio of the latter group of drugs  
22  
23 as the benefits they offer are significantly lower whereas the probability that they will  
24  
25 acquire a serious safety warning is the same. In this sample 90.8% (305/336) of drugs fell  
26  
27 into this category. Getting drugs with significant benefits to market quickly should be a  
28  
29 priority and Health Canada should investigate whether its ability to determine what type  
30  
31 of review is most appropriate for a NAS could be improved beyond its current 77.4%  
32  
33 accuracy. Being better able to determine the eventual therapeutic benefit could mean that  
34  
35 more than 71% (22/31) of drugs with significant therapeutic benefits will receive a  
36  
37 priority review while at the same time having fewer than 22% (67/305) without  
38  
39 significant therapeutic benefits getting the same type of resource intensive review.  
40  
41  
42  
43  
44  
45  
46  
47

48 Knowing that biologics do not have any greater probability of receiving a serious safety  
49  
50 warning compared with traditional medications is also reassuring as biologics now  
51  
52 constitute about 25% of all new drugs approved (15) and it is quite likely that drug  
53  
54 research and development will be increasingly turning to biologics. This study showed  
55  
56  
57  
58  
59  
60



1  
2  
3 that 27.3% of biologics eventually receive a serious safety warning or have to be  
4  
5 withdrawn from the market. This figure is virtually the same as the 29% Kaplan-Meier  
6  
7 estimate for a first safety-related regulatory action for biologics approved in the US and  
8  
9 the European Union between January 1995 and June 2008.(15)  
10  
11  
12  
13

14  
15 It needs to be noted that the presence or absence of regulatory safety warnings is not  
16  
17 equivalent to the overall safety of a product. An evaluation of overall safety would also  
18  
19 include an examination of risks detected prior to approval, contra-indications and  
20  
21 warnings about use of a drug. However, an examination of the time to the first  
22  
23 postmarket regulatory warning, the methodology that was used in this paper, is consistent  
24  
25 with what other authors have done in analyzing the postmarket safety profile of drugs in  
26  
27 general, (16) specific classes of drugs (15) and in comparing different groups of  
28  
29 drugs.(14)  
30  
31  
32  
33  
34  
35

36 This study has several limitations. One possible criticism is that there might be a  
37  
38 systematic difference in the frequency of adverse drug reaction (ADR) reporting  
39  
40 depending on the class of the drug so that, to take one scenario, ADRs might be  
41  
42 underreported for biologics compared to traditional drugs. However, postmarket  
43  
44 regulatory action encompasses more than just the receipt and analysis of ADR reports.  
45  
46 While safety reports are sometimes triggered by ADRs, Health Canada also utilizes other  
47  
48 sources of information in making its decision about issuing a serious safety warning.(17)  
49  
50  
51 The definition of a serious safety warning was based on the way that Health Canada  
52  
53 displayed the information (bolded black print and/or boxed text) but the criteria that  
54  
55  
56  
57  
58  
59  
60

1  
2  
3 Health Canada used to develop its safety warnings and the emphasis that it placed on any  
4 particular safety issue are not known. There were inconsistencies in the Health Canada  
5 databases. Some drugs identified as a NAS in the TPD annual reports were not called a  
6 NAS in the Notice of Compliance Online Query web site. Other drugs listed in the annual  
7 reports could not be found on the DPD web site. On-the-other hand, the information that  
8 gatifloxacin was no longer marketed in Canada was only found on the DPD web site. The  
9 date on which a NAS receives a NOC is not necessarily the date on which the company  
10 actually decides to market the drug and therefore the length of time the drug is available  
11 before it receives a safety warning may be shorter than what is reported here. The  
12 therapeutic value of 70 of the NAS could not be determined from the two sources  
13 consulted. It is not possible to determine whether there were differences in the number of  
14 people who were potentially harmed by the safety problems that triggered the safety  
15 warnings for the various drugs. Similarly, all safety warnings were treated as equivalent  
16 regardless of the possible number of people affected or potentially affected or the nature  
17 of the safety issue, e.g., a catastrophic side effect (efalizumab, progressive multifocal  
18 leukoencephalopathy) or a significant contraindication (dolasetron – any therapeutic use  
19 under 18 years age, any post operative nausea). (See Web Only Appendix.) Once again  
20 though, this approach is consistent with that used by Arnardottir (14), Giezen (15) and  
21 Lasser. (16)  
22  
23  
24  
25  
26  
27  
28  
29  
30  
31  
32  
33  
34  
35  
36  
37  
38  
39  
40  
41  
42  
43  
44  
45  
46  
47  
48  
49  
50

51 Although this study relied primarily on Canadian data, its conclusions regarding the  
52 postmarket safety profile of the four groups of drugs examined are likely to be  
53 generalizable to other countries and regions (e.g., Australia, European Union, United  
54  
55  
56  
57  
58  
59  
60

1  
2  
3 States) with similar drug regulatory agencies. The distinction between a drug derived  
4  
5 from traditional chemical synthesis and a biologic is independent of the regulatory  
6  
7 jurisdiction. The method used here to determine the therapeutic value of the products  
8  
9 relied on objective evaluations from two groups that did not have any conflicts of interest.  
10  
11

12  
13  
14  
15 One final question that this study raises is whether the current level of postmarket  
16  
17 regulatory safety warnings is acceptable. Depending on the group of drugs being  
18  
19 examined, between 27.3% to 40.2% eventually received a serious safety warning or were  
20  
21 withdrawn. This is a question that can only be answered through a detailed examination  
22  
23 of the way that Health Canada reviews the clinical trial information that it receives from  
24  
25 the pharmaceutical companies. At present, Health Canada's treatment of this information  
26  
27 as commercially confidential precludes such an examination.(18)  
28  
29  
30  
31  
32  
33  
34  
35  
36  
37  
38  
39  
40  
41  
42  
43  
44  
45  
46  
47  
48  
49  
50  
51  
52  
53  
54  
55  
56  
57  
58  
59  
60

### **Acknowledgements**

Loes Knaapen commented on an earlier version of this manuscript.

### **Competing Interests**

In 2008 Joel Lexchin was an expert witness for the Canadian federal government in its defence against a lawsuit challenging the ban on direct-to-consumer advertising. In 2010 he was an expert witness for a law firm representing the family of a plaintiff who allegedly died from an adverse reaction from a product made by Allergan. He is currently on the Management Board of Healthy Skepticism Inc. and is the Chair of the Health Action International – Europe Association Board.

### **Funding**

There was no funding involved in the research or writing of this article.

## References

1. Collier R. Post-market drug surveillance projects developing slowly. *CMAJ*. 2010;182:E43.
2. Silversides A. Health Canada's investment in new post-market drug surveillance network a "pittance". *CMAJ*. 2008;179:412.
3. Wiktorowicz ME, Lexchin J, Moscou K, Silversides A, Eggertson L. Keeping an eye on prescripition drugs...Keeping Canadians safe: active monitoring systems for drug safety and effectiveness in Canada and internationally. Toronto: Health Council of Canada, 2010.
4. Office of the Auditor General of Canada. Report of the Auditor General of Canada to the House of Commons. Chapter 4: regulating pharmaceutical drugs - Health Canada. Ottawa: 2011.
5. An Act to amend the Food and Drugs Act, Bill C-17 (2013).
6. Lazarou J, Pomeranz BH, Corey PN. Incidence of adverse drug reactions in hospitalized patients: a meta-analysis of prospective studies *JAMA*. 1998; 279 1200-5.
7. Moore TJ, Cohen MR, Furberg CD. QuarterWatch 2011 Quarter 4: FDA direct report rankings as risk index. 2012.
8. Moore TJ, Cohen MR, Furberg CD. Serious adverse drug events reported to the Food and Drug Administration, 1998-2005. *Archives of Internal Medicine*. 2007;167 1752-9.
9. Lexchin J. Drug withdrawals from the Canadian market for safety reasons, 1963 - 2004. *CMAJ*. 2005;172:765-7.
10. IMS Health Canada. Top 50 Prescribed Medications\*, 2003. 2004.
11. Lexchin J. New drugs and safety: what happened to new active substances approved in Canada between 1995 and 2010? *Archives of Internal Medicine*. 2012;172:1680-1.
12. Notice of compliance (NOC) database terminology Ottawa: Health Canada; 2010 [cited 2011 June 9]. Available from: [http://www.hc-sc.gc.ca/dhp-mps/prodpharma/notices-avis/noc-acc/term\\_noc\\_acc-eng.php](http://www.hc-sc.gc.ca/dhp-mps/prodpharma/notices-avis/noc-acc/term_noc_acc-eng.php).
13. Lexchin J. International comparison of assessments of drug innovation. *Health Policy*. 2012;105:221-5.
14. Arnardottir A, Hasijer-Ruskamp F, Straus S, Eichler H-G, de Graeff P, Mol P. Additional safety risk to exceptionally approved drugs in Europe. *British Journal of Clinical Pharmacology*. 2011;72:490-9.
15. Giezen TJ, Mantel-Teeuwisse AK, Straus SMJM, Schellekens H, Leufkens HGM, Egberts ACG. Safety-related regulatory actions for biologicals approved in the United States and the European Union. *JAMA*. 2008;300:1887-96.
16. Lasser KE, Allen PD, Woolhandler SJ, Himmelstein DU, Wolfe SM, Bor DH. Timing of new black box warnings and withdrawals for prescription medications. *JAMA*. 2002;287:2215-20.
17. MedEffect Canada. Health product vigilance framework: Health Canada; 2012 [cited 2013 October 16]. Available from: <http://www.hc-sc.gc.ca/dhp-mps/pubs/medeff/fs-if/2012-hpvh-cvps/index-eng.php>.
18. Herder M. Unlocking Health Canada's cache of trade secrets: mandatory disclosure of clinical trial results. *CMAJ*. 2012;184:194-9.

1  
2  
3  
4  
5  
6  
7  
8  
9  
10  
11  
12  
13  
14  
15  
16  
17  
18  
19  
20  
21  
22  
23  
24  
25  
26  
27  
28  
29  
30  
31  
32  
33  
34  
35  
36  
37  
38  
39  
40  
41  
42  
43  
44  
45  
46  
47  
48  
49  
50  
51  
52  
53  
54  
55  
56  
57  
58  
59  
60

For peer review only

1  
2  
3  
4  
5  
6  
7  
8  
9  
10  
11  
12  
13  
14  
15  
16  
17  
18  
19  
20  
21  
22  
23  
24  
25  
26  
27  
28  
29  
30  
31  
32  
33  
34  
35  
36  
37  
38  
39  
40  
41  
42  
43  
44  
45  
46  
47  
48  
49  
50  
51  
52  
53  
54  
55  
56  
57  
58  
59  
60

Figure 1: Kaplan-Meier estimate of new active substance survival: traditional medications versus biologics

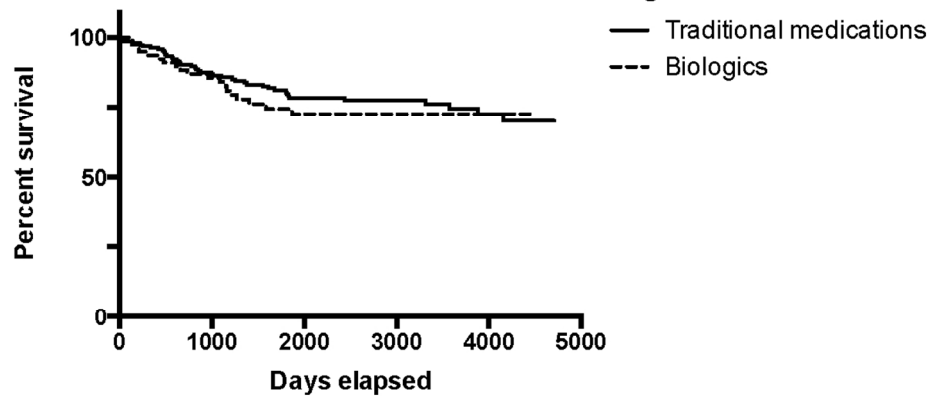

165x80mm (200 x 200 DPI)

er review only

Figure 2: Kaplan-Meier estimate of new active substance survival: significant therapeutic advance versus no significant therapeutic advance

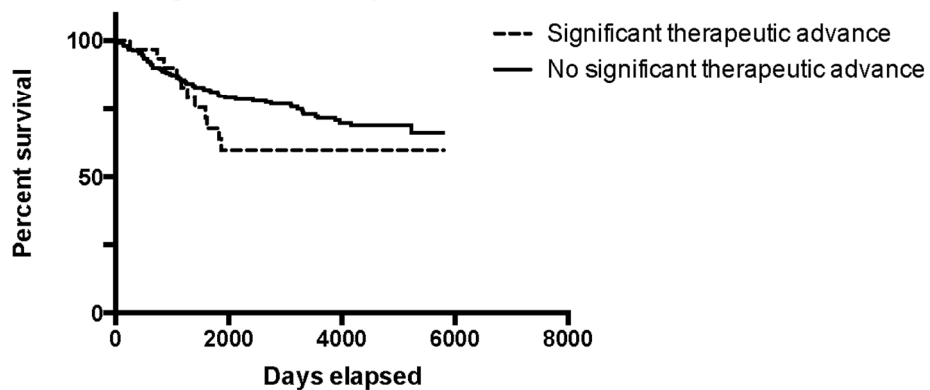

168x86mm (200 x 200 DPI)

Peer review only



1  
2  
3  
4  
5 **Web Only Appendix: Drugs With Serious Safety Warnings and/or Withdrawn From the Market**

6  
7  
8  
9  
10  
11  
12  
13  
14  
15  
16  
17  
18  
19  
20  
21  
22  
23  
24  
25  
26  
27  
28  
29  
30  
31  
32  
33  
34  
35  
36  
37  
38  
39  
40  
41  
42  
43  
44  
45  
46  
47  
48  
49

| Generic name | Brand name | Date of receipt of Notice Of Compliance | Date of first safety warning | Reason for warning                                                                       | Date of withdrawal from the market | Reason for withdrawal |
|--------------|------------|-----------------------------------------|------------------------------|------------------------------------------------------------------------------------------|------------------------------------|-----------------------|
| Abacavir     | Ziagen     | June 4, 1999                            | June 18, 2008                | Risk of cardiac events                                                                   |                                    |                       |
| Adalimumab   | Humira     | September 24, 2004                      | Feb. 2, 2005                 | Increased risk of hematologic events & increased risk infections when used with anakinra |                                    |                       |
| Alemtuzumab  | Mabcampath | November 30, 2005                       | November 18, 2008            | Infection related deaths                                                                 |                                    |                       |
| Anakinra     | Kineret    | May 24, 2002                            | December 17, 2002            | Higher incidence of serious infections when taken with etanercept                        |                                    |                       |
| Atomoxetine  | Strattera  | December 24, 2004                       | May 1, 2006                  | Cardiac related adverse events                                                           |                                    |                       |
| Belimumab    | Benlysta   | July 6, 2011                            | May 3, 2012                  | Severe and possibly fatal infusion and hypersensitivity reactions                        |                                    |                       |

|    |              |               |                   |                  |                                                                                 |                |                            |
|----|--------------|---------------|-------------------|------------------|---------------------------------------------------------------------------------|----------------|----------------------------|
| 1  |              |               |                   |                  |                                                                                 |                |                            |
| 2  |              |               |                   |                  |                                                                                 |                |                            |
| 3  |              |               |                   |                  |                                                                                 |                |                            |
| 4  |              |               |                   |                  |                                                                                 |                |                            |
| 5  | Bevacizumab  | Avastin       | September 9, 2005 | October 24, 2006 | Hypertensive encephalopathy & reversible posterior leukoencephalopathy syndrome |                |                            |
| 6  |              |               |                   |                  |                                                                                 |                |                            |
| 7  |              |               |                   |                  |                                                                                 |                |                            |
| 8  |              |               |                   |                  |                                                                                 |                |                            |
| 9  |              |               |                   |                  |                                                                                 |                |                            |
| 10 |              |               |                   |                  |                                                                                 |                |                            |
| 11 | Bupropion    | Wellbutrin SR | April 28, 1998    | July 3, 2001     | Reduction in risk of seizures and drug interactions                             |                |                            |
| 12 |              |               |                   |                  |                                                                                 |                |                            |
| 13 | Ceftobiprole | Zeftera       | June 26, 2008     |                  |                                                                                 | April 16, 2010 | Concerns re conduct trials |
| 14 |              |               |                   |                  |                                                                                 |                |                            |
| 15 | Celecoxib    | Celebrex      | April 14, 1999    | May 13, 2002     | Standard contraindications for NSAIDs added to Product Monograph                |                |                            |
| 16 |              |               |                   |                  |                                                                                 |                |                            |
| 17 |              |               |                   |                  |                                                                                 |                |                            |
| 18 |              |               |                   |                  |                                                                                 |                |                            |
| 19 |              |               |                   |                  |                                                                                 |                |                            |
| 20 |              |               |                   |                  |                                                                                 |                |                            |
| 21 |              |               |                   |                  |                                                                                 |                |                            |
| 22 |              |               |                   |                  |                                                                                 |                |                            |
| 23 | Cerivastatin | Baycol        | February 18, 1998 | July 16, 2001    | Rhabdomyolysis                                                                  | August 8, 2001 | Rhabdomyolysis             |
| 24 |              |               |                   |                  |                                                                                 |                |                            |
| 25 | Citalopram   | Celexa        | February 5, 1999  | May 26, 2004     | Risk of self harm                                                               |                |                            |
| 26 |              |               |                   |                  |                                                                                 |                |                            |
| 27 |              |               |                   |                  |                                                                                 |                |                            |
| 28 | Clopidrogel  | Plavix        | Oct. 7, 1998      | Aug. 14, 2009    | Use with PPIs can decrease effectiveness of clopidrogel                         |                |                            |
| 29 |              |               |                   |                  |                                                                                 |                |                            |
| 30 |              |               |                   |                  |                                                                                 |                |                            |
| 31 |              |               |                   |                  |                                                                                 |                |                            |
| 32 |              |               |                   |                  |                                                                                 |                |                            |
| 33 |              |               |                   |                  |                                                                                 |                |                            |
| 34 |              |               |                   |                  |                                                                                 |                |                            |
| 35 |              |               |                   |                  |                                                                                 |                |                            |
| 36 |              |               |                   |                  |                                                                                 |                |                            |
| 37 |              |               |                   |                  |                                                                                 |                |                            |
| 38 |              |               |                   |                  |                                                                                 |                |                            |
| 39 |              |               |                   |                  |                                                                                 |                |                            |
| 40 |              |               |                   |                  |                                                                                 |                |                            |
| 41 |              |               |                   |                  |                                                                                 |                |                            |
| 42 |              |               |                   |                  |                                                                                 |                |                            |
| 43 |              |               |                   |                  |                                                                                 |                |                            |
| 44 |              |               |                   |                  |                                                                                 |                |                            |
| 45 |              |               |                   |                  |                                                                                 |                |                            |
| 46 |              |               |                   |                  |                                                                                 |                |                            |
| 47 |              |               |                   |                  |                                                                                 |                |                            |
| 48 |              |               |                   |                  |                                                                                 |                |                            |
| 49 |              |               |                   |                  |                                                                                 |                |                            |

1  
2  
3  
4  
5  
6  
7  
8  
9  
10  
11  
12  
13  
14  
15  
16  
17  
18  
19  
20  
21  
22  
23  
24  
25  
26  
27  
28  
29  
30  
31  
32  
33  
34  
35  
36  
37  
38  
39  
40  
41  
42  
43  
44  
45  
46  
47  
48  
49

|                    |          |                  |                   |                                                                                                                                     |
|--------------------|----------|------------------|-------------------|-------------------------------------------------------------------------------------------------------------------------------------|
| Dabigatran         | Pradax   | June 10, 2008    | Mar. 16, 2012     | Assess renal function before using & while using; don't use in patients with hemodynamically significant rheumatic valvular disease |
| Daclizumab         | Zenaprax | January 4, 2000  | November 6, 2003  | Possible increase in mortality in cardiac transplant patients                                                                       |
| Darbepoetin alpha  | Aranesp  | August 2, 2002   | November 25, 2005 | Antibody mediated pure red cell aplasia                                                                                             |
| Darunavir          | Prezista | July 28, 2006    | May 12, 2008      | Hepatotoxicity                                                                                                                      |
| Dasatinib          | Sprycell | March 26, 2007   | August 26, 2011   | Pulmonary artery hypertension                                                                                                       |
| Deferasirox        | Exjade   | October 18, 2006 | March 9, 2007     | Acute renal failure & cytopenias                                                                                                    |
| Denosumab          | Prolia   | Aug. 6, 2010     | May 28, 2012      | Risk of severe symptomatic hypocalcemia (warning issued for Xgeva)                                                                  |
| Dexmethylphenidate | Attenade | August 12, 2003  | May 1, 2006       | Cardiac related adverse events                                                                                                      |

|    |                  |         |                     |                      |                                                                                                        |                     |                                                       |
|----|------------------|---------|---------------------|----------------------|--------------------------------------------------------------------------------------------------------|---------------------|-------------------------------------------------------|
| 1  |                  |         |                     |                      |                                                                                                        |                     |                                                       |
| 2  |                  |         |                     |                      |                                                                                                        |                     |                                                       |
| 3  |                  |         |                     |                      |                                                                                                        |                     |                                                       |
| 4  |                  |         |                     |                      |                                                                                                        |                     |                                                       |
| 5  | Dolastetron      | Anzemet | May 21,<br>1997     | June 23,<br>2006     | Contraindicated in those<br>under 18 for the<br>prevention & treatment<br>of post-operative nausea     |                     |                                                       |
| 6  |                  |         |                     |                      |                                                                                                        |                     |                                                       |
| 7  |                  |         |                     |                      |                                                                                                        |                     |                                                       |
| 8  |                  |         |                     |                      |                                                                                                        |                     |                                                       |
| 9  |                  |         |                     |                      |                                                                                                        |                     |                                                       |
| 10 |                  |         |                     |                      |                                                                                                        |                     |                                                       |
| 11 | Doripenem        | Doribax | Sept. 2,<br>2009    | Jan. 26,<br>2012     | Increased mortality<br>compared to imipenem-<br>cilastin                                               |                     |                                                       |
| 12 |                  |         |                     |                      |                                                                                                        |                     |                                                       |
| 13 |                  |         |                     |                      |                                                                                                        |                     |                                                       |
| 14 |                  |         |                     |                      |                                                                                                        |                     |                                                       |
| 15 | Dronedarone      | Multaq  | August 11,<br>2009  | March 10,<br>2011    | Hepatocellular liver<br>injury                                                                         |                     |                                                       |
| 16 |                  |         |                     |                      |                                                                                                        |                     |                                                       |
| 17 |                  |         |                     |                      |                                                                                                        |                     |                                                       |
| 18 | Drotrecogin Alfa | Xigris  | January 31,<br>2003 | January<br>31, 2005  | Increased mortality in<br>patients with single<br>organ dysfunction &<br>recent surgery                | October<br>25, 2011 | Failure to show<br>benefit                            |
| 19 |                  |         |                     |                      |                                                                                                        |                     |                                                       |
| 20 |                  |         |                     |                      |                                                                                                        |                     |                                                       |
| 21 |                  |         |                     |                      |                                                                                                        |                     |                                                       |
| 22 |                  |         |                     |                      |                                                                                                        |                     |                                                       |
| 23 |                  |         |                     |                      |                                                                                                        |                     |                                                       |
| 24 |                  |         |                     |                      |                                                                                                        |                     |                                                       |
| 25 | Efalizumab       | Raptiva | October 24,<br>2005 | December<br>22, 2008 | Progressive multifocal<br>leukoencephalopathy                                                          | Feb. 22,<br>2009    | Progressive<br>multifocal<br>leukoencephal-<br>opathy |
| 26 |                  |         |                     |                      |                                                                                                        |                     |                                                       |
| 27 |                  |         |                     |                      |                                                                                                        |                     |                                                       |
| 28 |                  |         |                     |                      |                                                                                                        |                     |                                                       |
| 29 |                  |         |                     |                      |                                                                                                        |                     |                                                       |
| 30 | Erlotinib        | Tarceva | July 7, 2005        | December<br>12, 2008 | Increased risk of death<br>in patients with<br>moderate hepatic<br>impairment & corneal<br>perforation |                     |                                                       |
| 31 |                  |         |                     |                      |                                                                                                        |                     |                                                       |
| 32 |                  |         |                     |                      |                                                                                                        |                     |                                                       |
| 33 |                  |         |                     |                      |                                                                                                        |                     |                                                       |
| 34 |                  |         |                     |                      |                                                                                                        |                     |                                                       |
| 35 |                  |         |                     |                      |                                                                                                        |                     |                                                       |
| 36 |                  |         |                     |                      |                                                                                                        |                     |                                                       |
| 37 |                  |         |                     |                      |                                                                                                        |                     |                                                       |
| 38 | Etanercept       | Enbrel  | December<br>1, 2000 | January<br>13, 2006  | Risk of hepatitis B virus<br>infection                                                                 |                     |                                                       |
| 39 |                  |         |                     |                      |                                                                                                        |                     |                                                       |
| 40 |                  |         |                     |                      |                                                                                                        |                     |                                                       |
| 41 |                  |         |                     |                      |                                                                                                        |                     |                                                       |
| 42 |                  |         |                     |                      |                                                                                                        |                     |                                                       |
| 43 |                  |         |                     |                      |                                                                                                        |                     |                                                       |
| 44 |                  |         |                     |                      |                                                                                                        |                     |                                                       |
| 45 |                  |         |                     |                      |                                                                                                        |                     |                                                       |
| 46 |                  |         |                     |                      |                                                                                                        |                     |                                                       |
| 47 |                  |         |                     |                      |                                                                                                        |                     |                                                       |
| 48 |                  |         |                     |                      |                                                                                                        |                     |                                                       |
| 49 |                  |         |                     |                      |                                                                                                        |                     |                                                       |

|    |                 |                             |                   |                   |                                                                              |               |                              |
|----|-----------------|-----------------------------|-------------------|-------------------|------------------------------------------------------------------------------|---------------|------------------------------|
| 1  |                 |                             |                   |                   |                                                                              |               |                              |
| 2  |                 |                             |                   |                   |                                                                              |               |                              |
| 3  |                 |                             |                   |                   |                                                                              |               |                              |
| 4  |                 |                             |                   |                   |                                                                              |               |                              |
| 5  | Etravirine      | Intelence                   | March 27, 2008    | October 15, 2009  | Severe skin & hypersensitivity reactions                                     |               |                              |
| 6  |                 |                             |                   |                   |                                                                              |               |                              |
| 7  |                 |                             |                   |                   |                                                                              |               |                              |
| 8  |                 |                             |                   |                   |                                                                              |               |                              |
| 9  | Ezetimibe       | Ezetrol                     | May 12, 2003      | Feb. 1, 2005      | Myalgia, rhabdomyolysis, hepatitis, pancreatitis & thrombocytopenia          |               |                              |
| 10 |                 |                             |                   |                   |                                                                              |               |                              |
| 11 |                 |                             |                   |                   |                                                                              |               |                              |
| 12 |                 |                             |                   |                   |                                                                              |               |                              |
| 13 |                 |                             |                   |                   |                                                                              |               |                              |
| 14 |                 |                             |                   |                   |                                                                              |               |                              |
| 15 | Formoterol      | Foradil dry powder capsules | March 6, 1997     | September 7, 2005 | Increased risk of asthma-related deaths in patients who also used salmeterol |               |                              |
| 16 |                 |                             |                   |                   |                                                                              |               |                              |
| 17 |                 |                             |                   |                   |                                                                              |               |                              |
| 18 |                 |                             |                   |                   |                                                                              |               |                              |
| 19 |                 |                             |                   |                   |                                                                              |               |                              |
| 20 |                 |                             |                   |                   |                                                                              |               |                              |
| 21 |                 |                             |                   |                   |                                                                              |               |                              |
| 22 | Fosamprenavir   | Telzir                      | December 10, 2004 | July 17, 2009     | Myocardial infarction                                                        |               |                              |
| 23 |                 |                             |                   |                   |                                                                              |               |                              |
| 24 | Gadoversetamide | Optimark                    | December 11, 2000 | January 8, 2010   | Nephrogenic systemic fibrosis                                                |               |                              |
| 25 |                 |                             |                   |                   |                                                                              |               |                              |
| 26 |                 |                             |                   |                   |                                                                              |               |                              |
| 27 | Galantamine     | Reminyl                     | July 31, 2001     | April 18, 2005    | Increase in mortality in patients with mild cognitive impairment             |               |                              |
| 28 |                 |                             |                   |                   |                                                                              |               |                              |
| 29 |                 |                             |                   |                   |                                                                              |               |                              |
| 30 |                 |                             |                   |                   |                                                                              |               |                              |
| 31 |                 |                             |                   |                   |                                                                              |               |                              |
| 32 | Gatifloxacin    | Tequin                      | January 9, 2001   | December 19, 2005 | Serious hypoglycemia and hyperglycemia                                       | June 29, 2006 | Glucose metabolism disorders |
| 33 |                 |                             |                   |                   |                                                                              |               |                              |
| 34 |                 |                             |                   |                   |                                                                              |               |                              |
| 35 |                 |                             |                   |                   |                                                                              |               |                              |
| 36 |                 |                             |                   |                   |                                                                              |               |                              |
| 37 |                 |                             |                   |                   |                                                                              |               |                              |
| 38 |                 |                             |                   |                   |                                                                              |               |                              |
| 39 |                 |                             |                   |                   |                                                                              |               |                              |
| 40 |                 |                             |                   |                   |                                                                              |               |                              |
| 41 |                 |                             |                   |                   |                                                                              |               |                              |
| 42 |                 |                             |                   |                   |                                                                              |               |                              |
| 43 |                 |                             |                   |                   |                                                                              |               |                              |
| 44 |                 |                             |                   |                   |                                                                              |               |                              |
| 45 |                 |                             |                   |                   |                                                                              |               |                              |
| 46 |                 |                             |                   |                   |                                                                              |               |                              |
| 47 |                 |                             |                   |                   |                                                                              |               |                              |
| 48 |                 |                             |                   |                   |                                                                              |               |                              |
| 49 |                 |                             |                   |                   |                                                                              |               |                              |

|    |                    |           |                    |                    |                                                                                         |                     |
|----|--------------------|-----------|--------------------|--------------------|-----------------------------------------------------------------------------------------|---------------------|
| 1  |                    |           |                    |                    |                                                                                         |                     |
| 2  |                    |           |                    |                    |                                                                                         |                     |
| 3  |                    |           |                    |                    |                                                                                         |                     |
| 4  |                    |           |                    |                    |                                                                                         |                     |
| 5  | Gefitinib          | Iressa    | December 17, 2003  | August 26, 2005    | Restricted use to patients whose tumours are EGFR expression status positive or unknown |                     |
| 6  |                    |           |                    |                    |                                                                                         |                     |
| 7  |                    |           |                    |                    |                                                                                         |                     |
| 8  |                    |           |                    |                    |                                                                                         |                     |
| 9  |                    |           |                    |                    |                                                                                         |                     |
| 10 |                    |           |                    |                    |                                                                                         |                     |
| 11 | Grepafloxacin      | Raxar     | April 9, 1998      |                    |                                                                                         | October 26, 1999    |
| 12 |                    |           |                    |                    |                                                                                         | Cardiac arrhythmias |
| 13 | Ibritumomab        | Zevalin   | May 10, 2005       | December 7, 2005   | Severe mucocutaneous reactions                                                          |                     |
| 14 |                    |           |                    |                    |                                                                                         |                     |
| 15 |                    |           |                    |                    |                                                                                         |                     |
| 16 |                    |           |                    |                    |                                                                                         |                     |
| 17 |                    |           |                    |                    |                                                                                         |                     |
| 18 | Imatinib           | Gleevec   | September 20, 2001 | September 21, 2006 | Significant decrease in left ventricular ejection failure and congestive heart failure  |                     |
| 19 |                    |           |                    |                    |                                                                                         |                     |
| 20 |                    |           |                    |                    |                                                                                         |                     |
| 21 |                    |           |                    |                    |                                                                                         |                     |
| 22 |                    |           |                    |                    |                                                                                         |                     |
| 23 |                    |           |                    |                    |                                                                                         |                     |
| 24 | Infliximab         | Remicade  | September 27, 2001 | November 29, 2004  | Risk of malignancies                                                                    |                     |
| 25 |                    |           |                    |                    |                                                                                         |                     |
| 26 | Infliximab         | Remicade  | June 6, 2001       | November 29, 2004  | Risk of malignancies                                                                    |                     |
| 27 |                    |           |                    |                    |                                                                                         |                     |
| 28 |                    |           |                    |                    |                                                                                         |                     |
| 29 | Interferon Beta-1A | Rebif     | February 5, 1998   | December 4, 2003   | Hepatotoxicity                                                                          |                     |
| 30 |                    |           |                    |                    |                                                                                         |                     |
| 31 |                    |           |                    |                    |                                                                                         |                     |
| 32 | Irinotecan         | Camptosar | July 4, 1997       | May 11, 2001       | Increased mortality in clinical trials                                                  |                     |
| 33 |                    |           |                    |                    |                                                                                         |                     |
| 34 |                    |           |                    |                    |                                                                                         |                     |
| 35 | Leflunomide        | Arava     | March 16, 2000     | May 4, 2001        | Hepatotoxicity                                                                          |                     |
| 36 |                    |           |                    |                    |                                                                                         |                     |
| 37 |                    |           |                    |                    |                                                                                         |                     |
| 38 | Levofloxacin       | Levaquin  | Nov. 14, 1997      | Mar. 9, 2012       | Worsening of symptoms of myasthenia gravis                                              |                     |
| 39 |                    |           |                    |                    |                                                                                         |                     |
| 40 |                    |           |                    |                    |                                                                                         |                     |
| 41 |                    |           |                    |                    |                                                                                         |                     |
| 42 |                    |           |                    |                    |                                                                                         |                     |
| 43 |                    |           |                    |                    |                                                                                         |                     |
| 44 |                    |           |                    |                    |                                                                                         |                     |
| 45 |                    |           |                    |                    |                                                                                         |                     |
| 46 |                    |           |                    |                    |                                                                                         |                     |
| 47 |                    |           |                    |                    |                                                                                         |                     |
| 48 |                    |           |                    |                    |                                                                                         |                     |
| 49 |                    |           |                    |                    |                                                                                         |                     |

|    |                        |           |            |           |                           |
|----|------------------------|-----------|------------|-----------|---------------------------|
| 1  |                        |           |            |           |                           |
| 2  |                        |           |            |           |                           |
| 3  |                        |           |            |           |                           |
| 4  |                        |           |            |           |                           |
| 5  | Lumiracoxib            | Prexige   | November   |           | October 3, Hepatotoxicity |
| 6  |                        |           | 2, 2006    |           | 2007                      |
| 7  | Methylnatrexone        | Relistor  | March 28,  | July 28,  | Gastrointestinal          |
| 8  |                        |           | 2008       | 2010      | perforation               |
| 9  | Mirtazapine            | Remeron   | May 18,    | May 26,   | Risk of self harm         |
| 10 |                        |           | 2001       | 2004      |                           |
| 11 | Modafinil              | Alertec   | February   | December  | Serious rash, allergic    |
| 12 |                        |           | 26, 1999   | 18, 2007  | reactions & mental        |
| 13 |                        |           |            |           | problems                  |
| 14 | Moroctocog alpha       | Refacto   | May 28,    | September | Lack of effect            |
| 15 |                        |           | 2002       | 15, 2003  |                           |
| 16 | Moxifloxacin           | Avelox    | Oct. 19,   | Mar. 9,   | Worsening of symptoms     |
| 17 |                        |           | 2000       | 2012      | of myasthenia gravis      |
| 18 | Natalizumab            | Tysabri   | September  | June 2,   | Liver injury &            |
| 19 |                        |           | 28, 2006   | 2008      | hypersensitivity          |
| 20 | Nevirapine             | Viramune  | September  | November  | Severe life-threatening   |
| 21 |                        |           | 4, 1998    | 10, 2000  | & fatal hepatotoxicity    |
| 22 | Norelgestromin/ethinyl | Evra      | August 20, | November  | Increased risk of venous  |
| 23 | estradiol              |           | 2002       | 21, 2006  | thromboembolism           |
| 24 | Oxcarbazepine          | Trileptal | April 13,  | April 27, | Life-threatening          |
| 25 |                        |           | 2000       | 2005      | dermatological reactions  |
| 26 |                        |           |            |           | & multi-organ             |
| 27 |                        |           |            |           | hypersensitivity          |
| 28 |                        |           |            |           |                           |
| 29 |                        |           |            |           |                           |
| 30 |                        |           |            |           |                           |
| 31 |                        |           |            |           |                           |
| 32 |                        |           |            |           |                           |
| 33 |                        |           |            |           |                           |
| 34 |                        |           |            |           |                           |
| 35 |                        |           |            |           |                           |
| 36 |                        |           |            |           |                           |
| 37 |                        |           |            |           |                           |
| 38 |                        |           |            |           |                           |
| 39 |                        |           |            |           |                           |
| 40 |                        |           |            |           |                           |
| 41 |                        |           |            |           |                           |
| 42 |                        |           |            |           |                           |
| 43 |                        |           |            |           |                           |
| 44 |                        |           |            |           |                           |
| 45 |                        |           |            |           |                           |
| 46 |                        |           |            |           |                           |
| 47 |                        |           |            |           |                           |
| 48 |                        |           |            |           |                           |
| 49 |                        |           |            |           |                           |

|    |               |           |                   |                  |                                                                                              |                                 |
|----|---------------|-----------|-------------------|------------------|----------------------------------------------------------------------------------------------|---------------------------------|
| 1  |               |           |                   |                  |                                                                                              |                                 |
| 2  |               |           |                   |                  |                                                                                              |                                 |
| 3  |               |           |                   |                  |                                                                                              |                                 |
| 4  |               |           |                   |                  |                                                                                              |                                 |
| 5  | Pegaptanib    | Macugen   | May 2, 2005       | January 12, 2006 | Hypersensitivity reaction                                                                    |                                 |
| 6  |               |           |                   |                  |                                                                                              |                                 |
| 7  | Pegvisomant   | Somavert  | October 17, 2005  | June 2, 2008     | Marked hepatic enzyme elevations (>10 times normal) with pegvisomant & somatostatin analogue |                                 |
| 8  |               |           |                   |                  |                                                                                              |                                 |
| 9  |               |           |                   |                  |                                                                                              |                                 |
| 10 |               |           |                   |                  |                                                                                              |                                 |
| 11 |               |           |                   |                  |                                                                                              |                                 |
| 12 |               |           |                   |                  |                                                                                              |                                 |
| 13 |               |           |                   |                  |                                                                                              |                                 |
| 14 |               |           |                   |                  |                                                                                              |                                 |
| 15 | Pioglitazone  | Actos     | August 17, 2000   | April 18, 2007   | Increased incidence of fractures in women                                                    |                                 |
| 16 |               |           |                   |                  |                                                                                              |                                 |
| 17 |               |           |                   |                  |                                                                                              |                                 |
| 18 |               |           |                   |                  |                                                                                              |                                 |
| 19 | Raloxifene    | Evista    | November 6, 1998  | May 18, 2006     | Increased mortality due to stroke                                                            |                                 |
| 20 |               |           |                   |                  |                                                                                              |                                 |
| 21 | Repaglinide   | Gluconorm | April 6, 1999     | July 17, 2003    | Should not be used in combination with gemfibrozil risk of severe and prolonged hypoglycemia |                                 |
| 22 |               |           |                   |                  |                                                                                              |                                 |
| 23 |               |           |                   |                  |                                                                                              |                                 |
| 24 |               |           |                   |                  |                                                                                              |                                 |
| 25 |               |           |                   |                  |                                                                                              |                                 |
| 26 |               |           |                   |                  |                                                                                              |                                 |
| 27 |               |           |                   |                  |                                                                                              |                                 |
| 28 |               |           |                   |                  |                                                                                              |                                 |
| 29 | Rituximab     | Rituxan   | March 17, 2000    | July 27, 2004    | Hepatitis B reactivation                                                                     |                                 |
| 30 |               |           |                   |                  |                                                                                              |                                 |
| 31 |               |           |                   |                  |                                                                                              |                                 |
| 32 | Rofecoxib     | Vioxx     | October 25, 1999  | April 15, 2002   | Increase in cardiovascular risk                                                              | September 30, 2004              |
| 33 |               |           |                   |                  |                                                                                              | Increased cardiovascular events |
| 34 |               |           |                   |                  |                                                                                              |                                 |
| 35 |               |           |                   |                  |                                                                                              |                                 |
| 36 | Rosiglitazone | Avandia   | March 21, 2000    | November 9, 2010 | Restrictions on use due to cardiac safety                                                    |                                 |
| 37 |               |           |                   |                  |                                                                                              |                                 |
| 38 |               |           |                   |                  |                                                                                              |                                 |
| 39 | Rosuvastatin  | Crestor   | February 18, 2003 | June 15, 2004    | Rhabdomyolysis                                                                               |                                 |
| 40 |               |           |                   |                  |                                                                                              |                                 |
| 41 |               |           |                   |                  |                                                                                              |                                 |
| 42 |               |           |                   |                  |                                                                                              |                                 |
| 43 |               |           |                   |                  |                                                                                              |                                 |
| 44 |               |           |                   |                  |                                                                                              |                                 |
| 45 |               |           |                   |                  |                                                                                              |                                 |
| 46 |               |           |                   |                  |                                                                                              |                                 |
| 47 |               |           |                   |                  |                                                                                              |                                 |
| 48 |               |           |                   |                  |                                                                                              |                                 |
| 49 |               |           |                   |                  |                                                                                              |                                 |



1  
2  
3  
4  
5  
6  
7  
8  
9  
10  
11  
12  
13  
14  
15  
16  
17  
18  
19  
20  
21  
22  
23  
24  
25  
26  
27  
28  
29  
30  
31  
32  
33  
34  
35  
36  
37  
38  
39  
40  
41  
42  
43  
44  
45  
46  
47  
48  
49

|               |          |                    |                    |                                                                                                        |                   |                               |
|---------------|----------|--------------------|--------------------|--------------------------------------------------------------------------------------------------------|-------------------|-------------------------------|
| Sibutramine   | Meridia  | December 28, 2000  |                    |                                                                                                        | October 8, 2010   | Serious cardiovascular events |
| Sildenafil    | Viagra   | March 8, 1999      | June 19, 2006      | Serious visual disturbances                                                                            |                   |                               |
| Sirolimus     | Rapamune | January 5, 2001    | May 14, 2002       | Increase in mortality, graft loss & hepatic artery thrombosis when used in conjunction with tacrolimus |                   |                               |
| Sitaxsentan   | Thelin   | May 30, 2007       | July 9, 2007       | Hepatotoxicity, risks to fetus & important drug-drug interactions                                      | December 15, 2010 | Hepatotoxicity                |
| Tadalafil     | Cialis   | September 17, 2003 | June 19, 2006      | Serious visual disturbances                                                                            |                   |                               |
| Tegaserod     | Zelnorm  | March 12, 2002     | April 28, 2004     | Diarrhoea & ischemic colitis                                                                           | March 30, 2007    | Cardiovascular events         |
| Telbivudine   | Sebivo   | November 28, 2006  | March 7, 2008      | Risk of peripheral neuropathy with telbivudine & interferon                                            |                   |                               |
| Telithromycin | Ketek    | May 28, 2003       | September 29, 2006 | Hepatic events, aggravation of myasthenia gravis & syncope                                             |                   |                               |

1  
2  
3  
4  
5  
6  
7  
8  
9  
10  
11  
12  
13  
14  
15  
16  
17  
18  
19  
20  
21  
22  
23  
24  
25  
26  
27  
28  
29  
30  
31  
32  
33  
34  
35  
36  
37  
38  
39  
40  
41  
42  
43  
44  
45  
46  
47  
48  
49

|               |                  |                   |                    |                                                                                                                   |                                     |
|---------------|------------------|-------------------|--------------------|-------------------------------------------------------------------------------------------------------------------|-------------------------------------|
| Temsirolimus  | Torisel          | December 21, 2007 | August 6, 2008     | Hypersensitivity/infusion reactions                                                                               |                                     |
| Tenofovir     | Viread           | Mar. 18, 2003     | June 9, 2005       | Co-administration with didanosine and either efavirenz or nevirapine can lead to high rate of virological failure |                                     |
| Tipranavir    | Aptivus          | November 21, 2005 | June 29, 2006      | Intracranial hemorrhage                                                                                           |                                     |
| Tocilizumab   | Actemra          | April 30, 2010    | September 13, 2010 | Fatal anaphylaxis                                                                                                 |                                     |
| Tolcapone     | Tasmar           | October 8, 1997   |                    |                                                                                                                   | November 20, 1998<br>Hepatotoxicity |
| Topiramate    | Topamax          | March 6, 1997     | September 13, 2001 | Acute myopia & secondary angle closure glaucoma                                                                   |                                     |
| Trastuzumab   | Herceptin        | Aug. 13, 1999     | Apr. 21, 2009      | Oligohydramnios                                                                                                   |                                     |
| Troglitazone  | Rezulin          | May 9, 1997       |                    |                                                                                                                   | March 15, 2000<br>Hepatotoxicity    |
| Trovafloxacin | Trovan (tablets) | December 4, 1998  |                    |                                                                                                                   | November 22, 2001<br>Hepatotoxicity |
| Valdecoxib    | Bextra           | December 11, 2002 | December 31, 2002  | Serious skin reactions                                                                                            | April 21, 2005<br>Skin reactions    |

1  
2  
3  
4  
5  
6  
7  
8  
9  
10  
11  
12  
13  
14  
15  
16  
17  
18  
19  
20  
21  
22  
23  
24  
25  
26  
27  
28  
29  
30  
31  
32  
33  
34  
35  
36  
37  
38  
39  
40  
41  
42  
43  
44  
45  
46  
47  
48  
49

|                 |          |                  |                 |                                                        |
|-----------------|----------|------------------|-----------------|--------------------------------------------------------|
| Vandetanib      | Caprelsa | Jan. 12, 2012    | Feb. 13, 2012   | QTc prolongation, Torsade de Pointes & sudden death    |
| Vardenafil      | Levitra  | March 17, 2004   | June 19, 2006   | Serious visual disturbances                            |
| Varenicline     | Champix  | January 24, 2007 | June 13, 2008   | Serious neuropsychiatric adverse events                |
| Zafirlukast     | Accolate | October 21, 1997 | October 7, 2002 | Hepatotoxicity                                         |
| Zoledronic acid | Zometa   | August 21, 2000  | August 9, 2005  | Clinically significant deterioration in renal function |

For peer review only

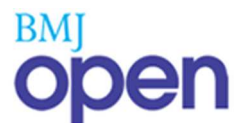

**Postmarket Safety in Canada: Are Significant Therapeutic Advances and Biologics Less Safe Than Other Drugs? A Cohort Study**

|                                 |                                                                                                                   |
|---------------------------------|-------------------------------------------------------------------------------------------------------------------|
| Journal:                        | <i>BMJ Open</i>                                                                                                   |
| Manuscript ID:                  | bmjopen-2013-004289.R2                                                                                            |
| Article Type:                   | Research                                                                                                          |
| Date Submitted by the Author:   | 26-Jan-2014                                                                                                       |
| Complete List of Authors:       | Lexchin, Joel; York University, School of Health Policy & Management                                              |
| <b>Primary Subject Heading</b>: | Health policy                                                                                                     |
| Secondary Subject Heading:      | Pharmacology and therapeutics                                                                                     |
| Keywords:                       | CLINICAL PHARMACOLOGY, Health policy < HEALTH SERVICES ADMINISTRATION & MANAGEMENT, Adverse events < THERAPEUTICS |
|                                 |                                                                                                                   |

SCHOLARONE™  
Manuscripts

Peer review only

1  
2  
3 **Postmarket Safety in Canada: Are Significant Therapeutic Advances and Biologics**  
4  
5 **Less Safe Than Other Drugs? A Cohort Study**  
6  
7

8 Joel Lexchin

9  
10 Professor, School of Health Policy and Management

11  
12 York University

13  
14 *and*

15  
16 Emergency Physician

17  
18 University Health Network

19  
20 *and*

21  
22 Associate Professor

23  
24 Department of Family and Community Medicine

25  
26 University of Toronto

27  
28 Toronto, Ontario

29  
30 Correspondence:

31  
32 Joel Lexchin MD

33  
34 School of Health Policy and Management

35  
36 York University

37  
38 4700 Keele St.

39  
40 Toronto, ON M3J 1P3

41  
42 Tel: 416-736-2100 x 22119

43  
44 Fax: 416-736-5227

45  
46 E mail: [jlexchin@yorku.ca](mailto:jlexchin@yorku.ca)

1  
2  
3 **Key words:** biologics, Canada, drug safety, small molecule, therapeutic  
4  
5 potential  
6  
7

8 **Word count:** 3055  
9  
10  
11  
12  
13  
14  
15  
16  
17  
18  
19  
20  
21  
22  
23  
24  
25  
26  
27  
28  
29  
30  
31  
32  
33  
34  
35  
36  
37  
38  
39  
40  
41  
42  
43  
44  
45  
46  
47  
48  
49  
50  
51  
52  
53  
54  
55  
56  
57  
58  
59  
60

For peer review only

## ABSTRACT

### Objectives

Examine the probability of new active substances (NAS) approved in Canada between January 1, 1997 and March 31, 2012 acquiring a serious postmarket safety warning.

### Design

Cohort study.

### Data sources

Annual reports of the Therapeutic Products Directorate and the Biologic and Genetic Therapies Directorate; evaluations of therapeutic innovation from Patented Medicine Prices Review Board and Prescrire International; MedEffect Canada web site.

### Interventions

Postmarket regulatory safety warning or withdrawal from market due to safety reasons.

### Primary and secondary outcome measures

Compare the probability of acquiring a postmarket safety warning in Canada in four different groups of drugs: 1) traditional medications versus biologics; 2) medications that offer significant new therapeutic benefits versus those that do not. Determine how well the type of review that a NAS received from Health Canada predicted the product's postmarket therapeutic value.

### Results

The probability of a traditional NAS acquiring a serious safety warning and/or being withdrawn was 29.9% (95% CI, 21.8, 40.2) versus 27.3% (95% CI, 18.2, 39.7) for a NAS of biologic origin ( $p = 0.47$ , log-rank test). For medications that were that significant

1  
2  
3 therapeutic advances the probability was 40.2% (95% CI, 24.5, 60.9) versus 33.9% (95  
4  
5  
6 CI, 26.4, 42.7) for those that were not ( $p = 0.18$ , log-rank test). Health Canada was 77.4%  
7  
8 accurate in predicting the therapeutic importance of a NAS.  
9

## 10 **Conclusions**

11  
12 There was no difference in postmarket regulatory safety action between traditional  
13  
14 medications and biologics and no difference between drugs with significant therapeutic  
15  
16 benefits and those without. Although these results draw on Canadian data they are likely  
17  
18 to be relevant internationally. Further research should assess whether the current level of  
19  
20 postmarket regulatory safety warnings is acceptable.  
21  
22  
23  
24  
25  
26  
27  
28  
29  
30  
31  
32  
33  
34  
35  
36  
37  
38  
39  
40  
41  
42  
43  
44  
45  
46  
47  
48  
49  
50  
51  
52  
53  
54  
55  
56  
57  
58  
59  
60



### Strengths and limitations of this study

- Systematic study of the postmarket regulatory safety warnings comparing groups of drugs: biologics versus traditional medicines and drugs with significant therapeutic advances versus drugs without significant therapeutic advances
- Comparison of premarket regulatory evaluation of therapeutic advance with postmarket evaluation
- Unclear what criteria Health Canada uses to decide to issue serious safety warnings
- Unknown date on which drug actually marketed as opposed to date approved
- Postmarket therapeutic evaluation of all new drugs could not be determined
- Presence of a postmarket safety warning does not necessarily equate with the overall safety of a drug

## INTRODUCTION

Drug safety is becoming a topic of increasing concern in Canada. In July 2008, the federal government officially launched the Drug Safety and Effectiveness Network (DSEN) designed to connect researchers throughout Canada in a virtual network to conduct post-market drug research (1) and stimulate research to study the impact of drug use in the real-world setting.(2) In 2010, the Health Council of Canada released a discussion paper that drew on international best practices for recommendations about how Canada could improve its developing system of active pharmacosurveillance.(3) In 2011, the Auditor General reported that Health Canada is slow to assess potential safety issues and can take more than two years to provide Canadians with new safety information.(4) Most recently, legislation has been introduced that would give Health Canada the power to order additional safety testing for drugs already on the market.(5)

The increased focus on drug safety comes from a number of directions. In the United States (US), adverse drug reactions (ADRs) are estimated to result in between 76,000 and 137,000 fatalities per year, making ADRs the fourth to sixth leading annual cause of death.(6) The Institute for Safe Medication Practices puts the number of annual deaths in the US due to ADRs at 128,000 based on reports to the Food and Drug Administration.(7) Since the Lazarou et al estimate was made in the late 1990s, reported serious adverse drug events increased 2.6-fold from 1998 to 2005 and fatal adverse drug events increased 2.7-fold during the same period while the total number of outpatient prescriptions went up by only 40%.(8) While there are relatively few drugs withdrawn from the market for safety reasons (9) large numbers of people have been exposed to

1  
2  
3 some of these products. In 2003, the year before rofecoxib (Vioxx®) was removed from  
4  
5 the market it was the 10<sup>th</sup> most frequently prescribed medication in Canada.(10)  
6  
7

8  
9  
10 A recent analysis of drug safety in Canada found that almost 1 in 4 new active substances  
11  
12 (NAS) approved between 1995 and 2010 either had a serious safety warning or were  
13  
14 removed from the market for safety reasons. (A NAS is a molecule never previously  
15  
16 marketed in any form in Canada. This designation is given to all molecules meeting the  
17  
18 definition and therefore should not be seen as creating a division between “new” and  
19  
20 “old” drugs.) This figure increased to more than 1 in 3 for products that received a  
21  
22 priority review, i.e., products that Health Canada felt might provide an effective treatment  
23  
24 of a disease for which no drug is presently marketed or a significant increase in efficacy  
25  
26 and/or significant decrease in risk over existing therapies.(11) Priority reviews have a  
27  
28 timeline of 180 days versus the standard timeline of 300 days.(12)  
29  
30  
31  
32  
33

34  
35  
36 This study compares postmarket regulatory safety action in four groups of drugs: 1)  
37  
38 traditional medications (those derived from chemical manufacturing) and biologics; 2)  
39  
40 medications that offer significant new therapeutic benefits and those that do not.  
41  
42 Biologics are large molecules synthesized from living organisms and typically  
43  
44 administered intravenously. As such they may have a significantly different safety profile  
45  
46 compared to traditional small molecule medications that come from chemical synthesis  
47  
48 and are usually ingested orally. Regulators may be willing to approve drugs that offer  
49  
50 significant therapeutic advances with more uncertainty about their safety compared to  
51  
52 drugs that are not a significant therapeutic advance.  
53  
54  
55  
56  
57  
58  
59  
60

1  
2  
3  
4  
5  
6 Specifically, this study attempts to reject the following two null hypotheses: 1) there is no  
7  
8 difference in the postmarket safety profile of traditional versus biologic medications, 2)  
9  
10 there is no difference in the postmarket safety profile of drugs with significant therapeutic  
11  
12 advances versus those without. A secondary objective was to determine how well the  
13  
14 type of review that a NAS received from Health Canada predicted the product's  
15  
16 postmarket therapeutic value.  
17  
18  
19  
20  
21

## 22 **METHODS**

23  
24 A list of NAS approved between January 1, 1997 and March 31, 2012 was compiled from  
25  
26 the annual reports of the Therapeutic Products Directorate (TPD) and the Biologic and  
27  
28 Genetic Therapies Directorate (BGTD) (henceforth collectively referred to as the TPD) -  
29  
30 available by directly contacting the directorates at <[publications@hc-sc.gc.ca](mailto:publications@hc-sc.gc.ca)>. For each  
31  
32 product the following information was abstracted: generic name, brand name,  
33  
34 manufacturer, indication, date of Notice of Compliance (NOC – marketing authorization),  
35  
36 type of review (priority or standard) and type of product (traditional or biologic). The  
37  
38 TPD annual reports only gave the type of product (traditional or biologic) from 2000  
39  
40 onwards.  
41  
42  
43  
44  
45  
46  
47

48 Two sources were used to determine the postmarket therapeutic value of the NAS: the  
49  
50 annual reports of the Patented Medicine Prices Review Board (PMPRB) available on-line  
51  
52 from 2003 to 2011 at <<http://www.pmprb-cepmb.gc.ca/english/View.asp?x=91>> and for  
53  
54 previous years by directly contacting the PMPRB at <[pmprb@pmprb-cepmb.gc.ca](mailto:pmprb@pmprb-cepmb.gc.ca)> and  
55  
56  
57  
58  
59  
60

1  
2  
3 the on-line reviews published by Prescrire International up to February 14, 2013  
4  
5 <<http://english.prescrire.org/en/>>. These sources were chosen because their evaluations  
6  
7 are unambiguous and therefore do not require any subjective interpretation and they are  
8  
9 both available in English.  
10  
11

12  
13  
14  
15 The PMPRB is a federal agency that is responsible for calculating the maximum  
16  
17 introductory price for all new patented medications introduced into the Canadian market.  
18  
19 As part of the process of determining the price, its Human Drug Advisory Panel  
20  
21 determines the therapeutic value of each product it reviews. Up until the end of 2009  
22  
23 NAS were classified into two groups: 1) breakthroughs or substantial improvement and  
24  
25 2) moderate, little or no therapeutic improvement. Since 2010 NAS are classified as  
26  
27 breakthrough or substantial improvement, moderate improvement (primary or secondary)  
28  
29 and slight or no improvement. For the purpose of this study, products that were deemed  
30  
31 breakthrough and substantial improvement were termed “significant therapeutic advance”  
32  
33 and products in other groups were termed “no therapeutic advance”. The change in the  
34  
35 PMPRB system starting in 2010 was meant to provide a finer gradation in the “moderate,  
36  
37 little or no therapeutic improvement” group and as such did not affect the dichotomous  
38  
39 classification used here between “significant therapeutic advance” and “no therapeutic  
40  
41 advance”. In some cases the PMPRB annual reports indicated that the therapeutic value  
42  
43 of the product was still being determined and in those cases the PMPRB was contacted  
44  
45 directly to determine the final classification.  
46  
47  
48  
49  
50  
51

52  
53  
54  
55 If the PMPRB had not considered a product then its therapeutic value was determined  
56  
57  
58  
59  
60

1  
2  
3 from Prescrire evaluations. Prescrire rates products using the following categories: bravo  
4 (major therapeutic innovation in an area where previously no treatment was available); a  
5  
6 (major therapeutic innovation in an area where previously no treatment was available); a  
7  
8 real advance (important therapeutic innovation but has limitations); offers an advantage  
9  
10 (some value but does not fundamentally change the present therapeutic practice);  
11  
12 possibly helpful (minimal additional value and should not change prescribing habits  
13  
14 except in rare circumstances); nothing new (may be new molecule but is superfluous  
15  
16 because does not add to clinical possibilities offered by previously available products);  
17  
18 not acceptable (without evident benefit but with potential or real disadvantages);  
19  
20 judgement reserved (decision postponed until better data and more thorough evaluation).  
21  
22 The first 3 Prescrire categories were defined as a significant therapeutic advance and the  
23  
24 other Prescrire categories (except judgement reserved) were defined as no therapeutic  
25  
26 advance. Previous work has shown a moderate level of agreement between the  
27  
28 therapeutic evaluations from the PMPRB and Prescrire.(13)  
29  
30  
31  
32  
33  
34  
35

36 Safety warnings and drug withdrawals for the period January 1, 1997 to December 31,  
37  
38 2012 were identified through advisories for health professionals on the MedEffect  
39  
40 Canada web site <[http://www.hc-sc.gc.ca/dhp-mps/medeff/advisories-avis/prof/index-](http://www.hc-sc.gc.ca/dhp-mps/medeff/advisories-avis/prof/index-eng.php)  
41  
42 [eng.php](http://www.hc-sc.gc.ca/dhp-mps/medeff/advisories-avis/prof/index-eng.php)>. For each safety advisory or notice of withdrawal of a product, the date and  
43  
44 reason was recorded. All serious safety advisories (those using bolded black print or  
45  
46 boxed warnings) were included except for those dealing with the withdrawal of a specific  
47  
48 batch or lot number due to manufacturing problems or those issued because of misuse of  
49  
50 a drug (e.g., an unapproved use) or medication errors (e.g., a warning about remembering  
51  
52 to remove a transdermal patch before applying a second one). When necessary, notices  
53  
54  
55  
56  
57  
58  
59  
60

1  
2  
3 on the MedEffect web site were supplemented by searching on the product name in the  
4 Drug Product Database (DPD) <<http://webprod3.hc-sc.gc.ca/dpd-bdpp/index-eng.jsp>>.

5  
6  
7  
8 The DPD contains product specific information on drugs approved for use in Canada as  
9  
10 well as all products discontinued since 1996.

11  
12  
13  
14  
15 Troglitazone was approved but never marketed in Canada because of a dispute about its  
16  
17 introductory price. There was no information about revocation of its NOC on the  
18  
19 MedEffect web site. The drug was removed from the US market in March 2000 and  
20  
21 March 15, 2000 was arbitrarily used as its withdrawal date in Canada. It was retained in  
22  
23 the analysis because it was a product that was approved and then later shown to have side  
24  
25 effects serious enough that it needed to be withdrawn. The TPD annual reports list  
26  
27 infliximab as two separate NAS since it was approved for two different indications –  
28  
29 Crohn's disease and rheumatoid arthritis and therefore it is included twice.  
30  
31  
32  
33  
34  
35

36  
37 The time between receipt of a NOC and a safety warning and/or withdrawal from the  
38  
39 market was calculated in days. If a drug received more than one serious safety warning  
40  
41 only the time to the first warning was used. Medians are reported for the time from NOC  
42  
43 to serious safety warnings and/or withdrawal as these values are not normally distributed  
44  
45 (Shapiro-Wilk test). Kaplan-Meier survival curves were calculated separately for the  
46  
47 following comparisons: a) biologic versus traditional NAS and b) NAS that were  
48  
49 therapeutic advances versus those that were not.  
50  
51  
52  
53  
54

55 Health Canada gives a shorter priority review to drugs that it believes show evidence of  
56  
57  
58  
59  
60

1  
2  
3 providing a significant increase in efficacy or a significant decrease in side effects  
4  
5 compared to other available agents for a serious, life-threatening or severely debilitating  
6  
7 illness or condition, i.e., drugs that Health Canada judges as significant therapeutic  
8  
9 gains.(12) Health Canada's accuracy in evaluating a NAS's therapeutic benefit was  
10  
11 determined by comparing the review status given to the drug (priority versus standard)  
12  
13 with the therapeutic evaluation from the PMPRB or Prescrire.  
14  
15  
16  
17  
18  
19

20 There were no power calculations as the entire population of NAS was evaluated rather  
21  
22 than just a sample. Calculations were done using Excel 2011 for Macintosh (Microsoft)  
23  
24 and Prism 6.0 (GraphPad Software).  
25  
26  
27  
28

## 29 **RESULTS**

30  
31 406 NAS were approved from January 1, 1997 to March 31, 2012. 87 (21.4%) were  
32  
33 subject to either a serious safety warning and/or were withdrawn for safety reasons: 72  
34  
35 (17.7%) had only serious safety warnings and 15 (3.7%) were withdrawn (8 had safety  
36  
37 warnings first and 7 were withdrawn without any prior safety warning). (Web Only  
38  
39 Appendix lists all drugs with safety warnings and/or withdrawals.) A notice that one  
40  
41 product, gatifloxacin, had been withdrawn from the market never appeared on the  
42  
43 MedEffect web site and the withdrawal was only confirmed on the DPD web site. The  
44  
45 median time to a first safety warning was 1094 days (interquartile range 551.8, 1812.5)  
46  
47 and 778 to withdrawal (interquartile range 486.5, 1119.5).  
48  
49  
50  
51  
52  
53  
54  
55  
56  
57  
58  
59  
60



1  
2  
3 Out of the 298 NAS approved from January 1, 2000 to March 31, 2012, 79 were  
4  
5 biologics (60 no safety warnings and 19 with safety warnings) and 219 were traditional  
6  
7 medications (175 no safety warnings and 44 with safety warnings). The therapeutic status  
8  
9 of 336 NAS was determined from either the PMPRB (296 NAS) or Prescrire (40 NAS)  
10  
11 evaluations. 305 were not significant therapeutic advances (232 no safety warnings and  
12  
13 73 safety warnings) and 31 were therapeutic advances (20 no safety warnings and 11  
14  
15 safety warnings). Of the 70 NAS where the therapeutic status could not be determined, 66  
16  
17 had no serious safety warnings and 4 had a warning; none were withdrawn from the  
18  
19 market.  
20  
21  
22  
23  
24  
25  
26

27 22 of the 31 NAS that were therapeutic advances received a priority review, whereas 67  
28  
29 of the 305 NAS that were not significant advances also had a priority review. Overall, the  
30  
31 review status was 77.4% accurate in determining the therapeutic rating of the NAS.  
32  
33  
34  
35

36 The Kaplan-Meier curves show that the probability of a traditional NAS acquiring a  
37  
38 serious safety warning and/or being withdrawn was 29.9% (95% CI, 21.8, 40.2) versus  
39  
40 27.3% (95% CI, 18.2, 39.7) for a NAS of biologic origin (Figure 1,  $p = 0.47$ , log-rank  
41  
42 test). For medications that were that significant therapeutic advances the probability was  
43  
44 40.2% (95% CI, 24.5, 60.9) versus 33.9% (95 CI, 26.4, 42.7) for those that were not  
45  
46 (Figure 2,  $p = 0.18$ , log-rank test).  
47  
48  
49  
50  
51  
52

## 53 DISCUSSION

54  
55 The results of this study support the null hypotheses in both cases of no difference in  
56  
57  
58  
59  
60

1  
2  
3 safety warnings between traditional medications versus biologics and no difference  
4  
5 between drugs with significant therapeutic benefits versus those without. However, given  
6  
7 the wide confidence intervals this conclusion should be regarded as tentative. Further  
8  
9 research using a larger number of NAS might show statistically significant differences.  
10  
11 Other comparisons between groups of drugs that have used safety warnings have  
12  
13 similarly found no difference in postmarket safety.(14)  
14  
15  
16  
17  
18  
19

20 The finding that there was no difference in the probability of acquiring a postmarket  
21  
22 safety warning for NAS regardless of their level of therapeutic benefit is welcome news  
23  
24 as it is one indication that more benefits are not being traded off against more harms. At  
25  
26 the same time, it also calls into question the benefit:harm ratio of the latter group of drugs  
27  
28 as the benefits they offer are significantly lower whereas the probability that they will  
29  
30 acquire a serious safety warning is the same. In this study, 90.8% (305/336) of drugs  
31  
32 were of no additional significant therapeutic benefit and fell into this category. Getting  
33  
34 drugs with significant benefits to market quickly should be a priority and Health Canada  
35  
36 should investigate whether its ability to determine what type of review is most  
37  
38 appropriate for a NAS could be improved beyond its current level of 77.4% accuracy.  
39  
40 Being better able to determine the eventual therapeutic benefit could mean that more than  
41  
42 71% (22/31) of drugs with significant therapeutic benefits will receive a priority review  
43  
44 while at the same time having fewer than 22% (67/305) without significant therapeutic  
45  
46 benefits getting the same type of resource intensive review.  
47  
48  
49  
50  
51

52  
53  
54  
55 Knowing that biologics do not have any greater probability of receiving a serious safety  
56  
57  
58  
59  
60

1  
2  
3 warning compared with traditional medications is also reassuring as biologics now  
4  
5 constitute about 25% of all new drugs approved (15) and it is quite likely that drug  
6  
7 research and development will be increasingly turning to biologics. This study showed  
8  
9 that 27.3% of biologics eventually receive a serious safety warning or have to be  
10  
11 withdrawn from the market. This figure is virtually the same as the 29% Kaplan-Meier  
12  
13 estimate for a first safety-related regulatory action for biologics approved in the US and  
14  
15 the European Union between January 1995 and June 2008.(15)  
16  
17  
18  
19  
20

21  
22 It needs to be noted that the presence or absence of regulatory safety warnings is not  
23  
24 equivalent to the overall safety of a product. An evaluation of overall safety would also  
25  
26 include an examination of risks detected prior to approval, contra-indications and  
27  
28 warnings about use of a drug. However, an examination of the time to the first  
29  
30 postmarket regulatory warning, the methodology that was used in this paper, is consistent  
31  
32 with what other authors have done in analyzing the postmarket safety profile of drugs in  
33  
34 general, (16) specific classes of drugs (15) and in comparing different groups of  
35  
36 drugs.(14)  
37  
38  
39  
40  
41  
42

43 This study has several limitations. One possible criticism is that there might be a  
44  
45 systematic difference in the frequency of adverse drug reaction (ADR) reporting  
46  
47 depending on the class of the drug so that, to take one scenario, ADRs might be  
48  
49 underreported for biologics compared to traditional drugs. However, postmarket  
50  
51 regulatory action encompasses more than just the receipt and analysis of ADR reports.  
52  
53 While safety reports are sometimes triggered by ADRs, Health Canada also utilizes other  
54  
55  
56  
57  
58  
59  
60

1  
2  
3 sources of information in making its decision about issuing a serious safety warning.(17)  
4  
5 The definition of a serious safety warning was based on the way that Health Canada  
6  
7 displayed the information (bolded black print and/or boxed text) but the criteria that  
8  
9 Health Canada used to develop its safety warnings and the emphasis that it placed on any  
10  
11 particular safety issue are not known. There were inconsistencies in the Health Canada  
12  
13 databases. Some drugs identified as a NAS in the TPD annual reports were not called a  
14  
15 NAS in the Notice of Compliance Online Query web site. Other drugs listed in the annual  
16  
17 reports could not be found on the DPD web site. On-the-other hand, the information that  
18  
19 gatifloxacin was no longer marketed in Canada was only found on the DPD web site. The  
20  
21 date on which a NAS receives a NOC is not necessarily the date on which the company  
22  
23 actually decides to market the drug and therefore the length of time the drug is available  
24  
25 before it receives a safety warning may be shorter than what is reported here. The  
26  
27 therapeutic value of 70 of the NAS could not be determined from the two sources  
28  
29 consulted. It is not possible to determine whether there were differences in the number of  
30  
31 people who were potentially harmed by the safety problems that triggered the safety  
32  
33 warnings for the various drugs. Similarly, all safety warnings were treated as equivalent  
34  
35 regardless of the possible number of people affected or potentially affected or the nature  
36  
37 of the safety issue, e.g., a catastrophic side effect (efalizumab, progressive multifocal  
38  
39 leukoencephalopathy) or a significant contraindication (dolasetron – any therapeutic use  
40  
41 under 18 years age, any post operative nausea). (See Web Only Appendix.) Once again  
42  
43 though, this approach is consistent with that used by Arnardottir (14), Giezen (15) and  
44  
45 Lasser. (16) Finally, it is important to note that the regulatory decision to issue a safety  
46  
47 warning should not be equated with the actual degree of harm caused by the drug.  
48  
49  
50  
51  
52  
53  
54  
55  
56  
57  
58  
59  
60

1  
2  
3  
4  
5  
6 Although this study relied primarily on Canadian data, its conclusions regarding the  
7  
8 postmarket safety profile of the four groups of drugs examined are likely to be  
9  
10 generalizable to other countries and regions (e.g., Australia, European Union, United  
11  
12 States) with similar drug regulatory agencies. The distinction between a drug derived  
13  
14 from traditional chemical synthesis and a biologic is independent of the regulatory  
15  
16 jurisdiction. The method used here to determine the therapeutic value of the products  
17  
18 relied on objective evaluations from two groups that did not have any conflicts of interest.  
19  
20  
21  
22  
23

24  
25 One final question that this study raises is whether the current level of premarket safety  
26  
27 evaluation undertaken by Health Canada is acceptable. Depending on the group of drugs  
28  
29 being examined, between 27.3% to 40.2% eventually received a serious safety warning or  
30  
31 were withdrawn. This is a question that can only be answered through a detailed  
32  
33 examination of the way that Health Canada reviews the clinical trial information that it  
34  
35 receives from the pharmaceutical companies. At present, Health Canada's treatment of  
36  
37 this information as commercially confidential precludes such an examination.(18)  
38  
39  
40  
41  
42  
43  
44  
45  
46  
47  
48  
49  
50  
51  
52  
53  
54  
55  
56  
57  
58  
59  
60

## Acknowledgements

Loes Knaapen commented on an earlier version of this manuscript.

## Competing Interests

In 2008 Joel Lexchin was an expert witness for the Canadian federal government in its defence against a lawsuit challenging the ban on direct-to-consumer advertising. In 2010 he was an expert witness for a law firm representing the family of a plaintiff who allegedly died from an adverse reaction from a product made by Allergan. He is currently on the Management Board of Healthy Skepticism Inc. and is the Chair of the Health Action International – Europe Association Board.

## Funding

There was no funding involved in the research or writing of this article.

**Figure 1:** Kaplan-meier estimate of new active substance survival: traditional medications versus biologics.

**Figure 2:** Kaplan-meier estimate of new active substance survival: significance therapeutic advance versus no significant therapeutic advance.

## References

1. Collier R. Post-market drug surveillance projects developing slowly. CMAJ. 2010;182:E43.
2. Silversides A. Health Canada's investment in new post-market drug surveillance network a "pittance". CMAJ. 2008;179:412.
3. Wiktorowicz ME, Lexchin J, Moscou K, et al. Keeping an eye on prescripition drugs...Keeping Canadians safe: active monitoring systems for drug safety and effectiveness in Canada and internationally. Toronto: Health Council of Canada, 2010.
4. Office of the Auditor General of Canada. Report of the Auditor General of Canada to the House of Commons. Chapter 4: regulating pharmaceutical drugs - Health Canada. Ottawa: 2011.
5. An Act to amend the Food and Drugs Act, Bill C-17 (2013).
6. Lazarou J, Pomeranz BH, Corey PN. Incidence of adverse drug reactions in hospitalized patients: a meta-analysis of prospective studies JAMA. 1998; 279 1200-5.
7. Moore TJ, Cohen MR, Furberg CD. QuarterWatch 2011 Quarter 4: FDA direct report rankings as risk index. 2012.
8. Moore TJ, Cohen MR, Furberg CD. Serious adverse drug events reported to the Food and Drug Administration, 1998-2005. Archives of Internal Medicine. 2007;167 1752-9.
9. Lexchin J. Drug withdrawals from the Canadian market for safety reasons, 1963 - 2004. CMAJ. 2005;172:765-7.
10. IMS Health Canada. Top 50 Prescribed Medications\*, 2003. 2004.

- 1  
2  
3  
4  
5  
6  
7  
8  
9  
10  
11  
12  
13  
14  
15  
16  
17  
18  
19  
20  
21  
22  
23  
24  
25  
26  
27  
28  
29  
30  
31  
32  
33  
34  
35  
36  
37  
38  
39  
40  
41  
42  
43  
44  
45  
46  
47  
48  
49  
50  
51  
52  
53  
54  
55  
56  
57  
58  
59  
60
11. Lexchin J. New drugs and safety: what happened to new active substances approved in Canada between 1995 and 2010? *Archives of Internal Medicine*. 2012;172:1680-1.
  12. Notice of compliance (NOC) database terminology Ottawa: Health Canada; 2010 [cited 2011 June 9]. Available from: [http://www.hc-sc.gc.ca/dhp-mps/prodpharma/notices-avis/noc-acc/term\\_noc\\_acc-eng.php](http://www.hc-sc.gc.ca/dhp-mps/prodpharma/notices-avis/noc-acc/term_noc_acc-eng.php).
  13. Lexchin J. International comparison of assessments of drug innovation. *Health Policy*. 2012;105:221-5.
  14. Arnardottir A, Hasijer-Ruskamp F, Straus S, et al. Additional safety risk to exceptionally approved drugs in Europe. *British Journal of Clinical Pharmacology*. 2011;72:490-9.
  15. Giezen TJ, Mantel-Teeuwisse AK, Straus SMJM, et al. Safety-related regulatory actions for biologicals approved in the United States and the European Union. *JAMA*. 2008;300:1887-96.
  16. Lasser KE, Allen PD, Woolhandler SJ, et al. Timing of new black box warnings and withdrawals for prescription medications. *JAMA*. 2002;287:2215-20.
  17. MedEffect Canada. Health product vigilance framework: Health Canada; 2012 [cited 2013 October 16]. Available from: [http://www.hc-sc.gc.ca/dhp-mps/pubs/medeff/\\_fs-if/2012-hpvf-cvps/index-eng.php](http://www.hc-sc.gc.ca/dhp-mps/pubs/medeff/_fs-if/2012-hpvf-cvps/index-eng.php).
  18. Herder M. Unlocking Health Canada's cache of trade secrets: mandatory disclosure of clinical trial results. *CMAJ*. 2012;184:194-9.



1  
2  
3  
4  
5  
6  
7  
8  
9  
10  
11  
12  
13  
14  
15  
16  
17  
18  
19  
20  
21  
22  
23  
24  
25  
26  
27  
28  
29  
30  
31  
32  
33  
34  
35  
36  
37  
38  
39  
40  
41  
42  
43  
44  
45  
46  
47  
48  
49  
50  
51  
52  
53  
54  
55  
56  
57  
58  
59  
60

Figure 1: Kaplan-Meier estimate of new active substance survival: traditional medications versus biologics

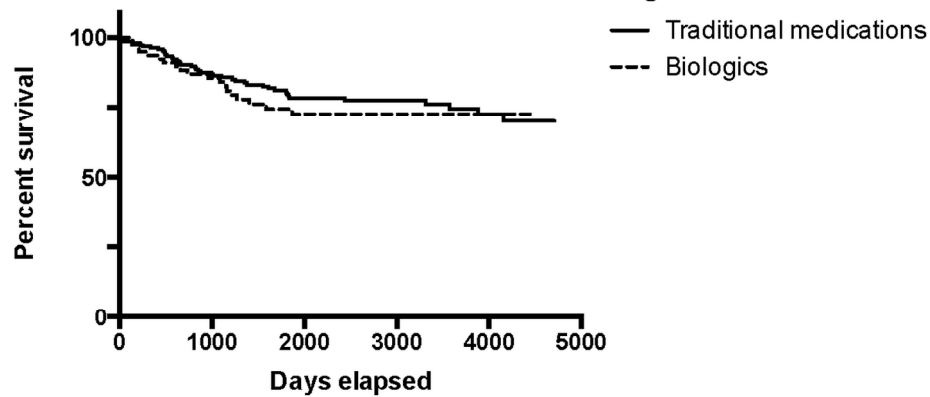

185x90mm (300 x 300 DPI)

er review only

Figure 2: Kaplan-Meier estimate of new active substance survival: significant therapeutic advance versus no significant therapeutic advance

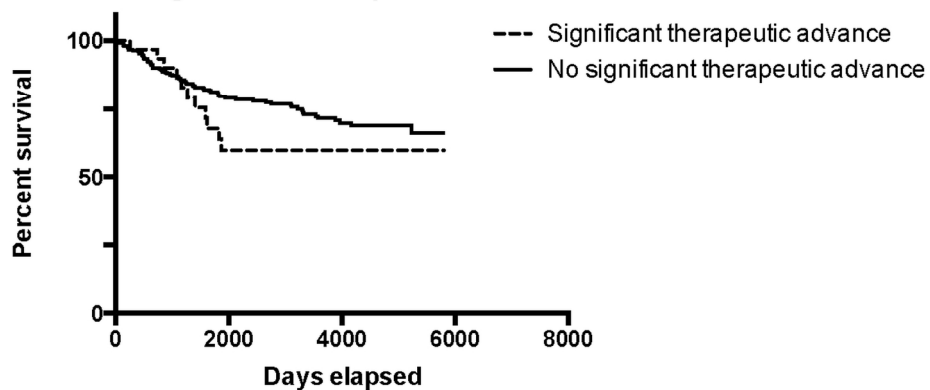

175x90mm (300 x 300 DPI)

For peer review only

1  
2  
3  
4  
5 **Web Only Appendix: Drugs With Serious Safety Warnings and/or Withdrawn From the Market**

6  
7  
8  
9  
10  
11  
12  
13  
14  
15  
16  
17  
18  
19  
20  
21  
22  
23  
24  
25  
26  
27  
28  
29  
30  
31  
32  
33  
34  
35  
36  
37  
38  
39  
40  
41  
42  
43  
44  
45  
46  
47  
48  
49

| Generic name | Brand name | Date of receipt of Notice Of Compliance | Date of first safety warning | Reason for warning                                                                       | Date of withdrawal from the market | Reason for withdrawal |
|--------------|------------|-----------------------------------------|------------------------------|------------------------------------------------------------------------------------------|------------------------------------|-----------------------|
| Abacavir     | Ziagen     | June 4, 1999                            | June 18, 2008                | Risk of cardiac events                                                                   |                                    |                       |
| Adalimumab   | Humira     | September 24, 2004                      | Feb. 2, 2005                 | Increased risk of hematologic events & increased risk infections when used with anakinra |                                    |                       |
| Alemtuzumab  | Mabcampath | November 30, 2005                       | November 18, 2008            | Infection related deaths                                                                 |                                    |                       |
| Anakinra     | Kineret    | May 24, 2002                            | December 17, 2002            | Higher incidence of serious infections when taken with etanercept                        |                                    |                       |
| Atomoxetine  | Strattera  | December 24, 2004                       | May 1, 2006                  | Cardiac related adverse events                                                           |                                    |                       |
| Belimumab    | Benlysta   | July 6, 2011                            | May 3, 2012                  | Severe and possibly fatal infusion and hypersensitivity reactions                        |                                    |                       |

|    |              |               |                   |                  |                                                                                 |                |                            |
|----|--------------|---------------|-------------------|------------------|---------------------------------------------------------------------------------|----------------|----------------------------|
| 1  |              |               |                   |                  |                                                                                 |                |                            |
| 2  |              |               |                   |                  |                                                                                 |                |                            |
| 3  |              |               |                   |                  |                                                                                 |                |                            |
| 4  |              |               |                   |                  |                                                                                 |                |                            |
| 5  | Bevacizumab  | Avastin       | September 9, 2005 | October 24, 2006 | Hypertensive encephalopathy & reversible posterior leukoencephalopathy syndrome |                |                            |
| 6  |              |               |                   |                  |                                                                                 |                |                            |
| 7  |              |               |                   |                  |                                                                                 |                |                            |
| 8  |              |               |                   |                  |                                                                                 |                |                            |
| 9  |              |               |                   |                  |                                                                                 |                |                            |
| 10 |              |               |                   |                  |                                                                                 |                |                            |
| 11 | Bupropion    | Wellbutrin SR | April 28, 1998    | July 3, 2001     | Reduction in risk of seizures and drug interactions                             |                |                            |
| 12 |              |               |                   |                  |                                                                                 |                |                            |
| 13 | Ceftobiprole | Zeftera       | June 26, 2008     |                  |                                                                                 | April 16, 2010 | Concerns re conduct trials |
| 14 |              |               |                   |                  |                                                                                 |                |                            |
| 15 | Celecoxib    | Celebrex      | April 14, 1999    | May 13, 2002     | Standard contraindications for NSAIDs added to Product Monograph                |                |                            |
| 16 |              |               |                   |                  |                                                                                 |                |                            |
| 17 |              |               |                   |                  |                                                                                 |                |                            |
| 18 |              |               |                   |                  |                                                                                 |                |                            |
| 19 |              |               |                   |                  |                                                                                 |                |                            |
| 20 |              |               |                   |                  |                                                                                 |                |                            |
| 21 |              |               |                   |                  |                                                                                 |                |                            |
| 22 |              |               |                   |                  |                                                                                 |                |                            |
| 23 | Cerivastatin | Baycol        | February 18, 1998 | July 16, 2001    | Rhabdomyolysis                                                                  | August 8, 2001 | Rhabdomyolysis             |
| 24 |              |               |                   |                  |                                                                                 |                |                            |
| 25 | Citalopram   | Celexa        | February 5, 1999  | May 26, 2004     | Risk of self harm                                                               |                |                            |
| 26 |              |               |                   |                  |                                                                                 |                |                            |
| 27 |              |               |                   |                  |                                                                                 |                |                            |
| 28 | Clopidrogel  | Plavix        | Oct. 7, 1998      | Aug. 14, 2009    | Use with PPIs can decrease effectiveness of clopidrogel                         |                |                            |
| 29 |              |               |                   |                  |                                                                                 |                |                            |
| 30 |              |               |                   |                  |                                                                                 |                |                            |
| 31 |              |               |                   |                  |                                                                                 |                |                            |
| 32 |              |               |                   |                  |                                                                                 |                |                            |
| 33 |              |               |                   |                  |                                                                                 |                |                            |
| 34 |              |               |                   |                  |                                                                                 |                |                            |
| 35 |              |               |                   |                  |                                                                                 |                |                            |
| 36 |              |               |                   |                  |                                                                                 |                |                            |
| 37 |              |               |                   |                  |                                                                                 |                |                            |
| 38 |              |               |                   |                  |                                                                                 |                |                            |
| 39 |              |               |                   |                  |                                                                                 |                |                            |
| 40 |              |               |                   |                  |                                                                                 |                |                            |
| 41 |              |               |                   |                  |                                                                                 |                |                            |
| 42 |              |               |                   |                  |                                                                                 |                |                            |
| 43 |              |               |                   |                  |                                                                                 |                |                            |
| 44 |              |               |                   |                  |                                                                                 |                |                            |
| 45 |              |               |                   |                  |                                                                                 |                |                            |
| 46 |              |               |                   |                  |                                                                                 |                |                            |
| 47 |              |               |                   |                  |                                                                                 |                |                            |
| 48 |              |               |                   |                  |                                                                                 |                |                            |
| 49 |              |               |                   |                  |                                                                                 |                |                            |

1  
2  
3  
4  
5  
6  
7  
8  
9  
10  
11  
12  
13  
14  
15  
16  
17  
18  
19  
20  
21  
22  
23  
24  
25  
26  
27  
28  
29  
30  
31  
32  
33  
34  
35  
36  
37  
38  
39  
40  
41  
42  
43  
44  
45  
46  
47  
48  
49

|                    |          |                  |                   |                                                                                                                                     |
|--------------------|----------|------------------|-------------------|-------------------------------------------------------------------------------------------------------------------------------------|
| Dabigatran         | Pradax   | June 10, 2008    | Mar. 16, 2012     | Assess renal function before using & while using; don't use in patients with hemodynamically significant rheumatic valvular disease |
| Daclizumab         | Zenaprax | January 4, 2000  | November 6, 2003  | Possible increase in mortality in cardiac transplant patients                                                                       |
| Darbepoetin alpha  | Aranesp  | August 2, 2002   | November 25, 2005 | Antibody mediated pure red cell aplasia                                                                                             |
| Darunavir          | Prezista | July 28, 2006    | May 12, 2008      | Hepatotoxicity                                                                                                                      |
| Dasatinib          | Sprycell | March 26, 2007   | August 26, 2011   | Pulmonary artery hypertension                                                                                                       |
| Deferasirox        | Exjade   | October 18, 2006 | March 9, 2007     | Acute renal failure & cytopenias                                                                                                    |
| Denosumab          | Prolia   | Aug. 6, 2010     | May 28, 2012      | Risk of severe symptomatic hypocalcemia (warning issued for Xgeva)                                                                  |
| Dexmethylphenidate | Attenade | August 12, 2003  | May 1, 2006       | Cardiac related adverse events                                                                                                      |

|    |                  |         |                     |                      |                                                                                                        |                     |                                                       |
|----|------------------|---------|---------------------|----------------------|--------------------------------------------------------------------------------------------------------|---------------------|-------------------------------------------------------|
| 1  |                  |         |                     |                      |                                                                                                        |                     |                                                       |
| 2  |                  |         |                     |                      |                                                                                                        |                     |                                                       |
| 3  |                  |         |                     |                      |                                                                                                        |                     |                                                       |
| 4  |                  |         |                     |                      |                                                                                                        |                     |                                                       |
| 5  | Dolastetron      | Anzemet | May 21,<br>1997     | June 23,<br>2006     | Contraindicated in those<br>under 18 for the<br>prevention & treatment<br>of post-operative nausea     |                     |                                                       |
| 6  |                  |         |                     |                      |                                                                                                        |                     |                                                       |
| 7  |                  |         |                     |                      |                                                                                                        |                     |                                                       |
| 8  |                  |         |                     |                      |                                                                                                        |                     |                                                       |
| 9  |                  |         |                     |                      |                                                                                                        |                     |                                                       |
| 10 |                  |         |                     |                      |                                                                                                        |                     |                                                       |
| 11 | Doripenem        | Doribax | Sept. 2,<br>2009    | Jan. 26,<br>2012     | Increased mortality<br>compared to imipenem-<br>cilastin                                               |                     |                                                       |
| 12 |                  |         |                     |                      |                                                                                                        |                     |                                                       |
| 13 |                  |         |                     |                      |                                                                                                        |                     |                                                       |
| 14 |                  |         |                     |                      |                                                                                                        |                     |                                                       |
| 15 | Dronedarone      | Multaq  | August 11,<br>2009  | March 10,<br>2011    | Hepatocellular liver<br>injury                                                                         |                     |                                                       |
| 16 |                  |         |                     |                      |                                                                                                        |                     |                                                       |
| 17 |                  |         |                     |                      |                                                                                                        |                     |                                                       |
| 18 | Drotrecogin Alfa | Xigris  | January 31,<br>2003 | January<br>31, 2005  | Increased mortality in<br>patients with single<br>organ dysfunction &<br>recent surgery                | October<br>25, 2011 | Failure to show<br>benefit                            |
| 19 |                  |         |                     |                      |                                                                                                        |                     |                                                       |
| 20 |                  |         |                     |                      |                                                                                                        |                     |                                                       |
| 21 |                  |         |                     |                      |                                                                                                        |                     |                                                       |
| 22 |                  |         |                     |                      |                                                                                                        |                     |                                                       |
| 23 |                  |         |                     |                      |                                                                                                        |                     |                                                       |
| 24 |                  |         |                     |                      |                                                                                                        |                     |                                                       |
| 25 | Efalizumab       | Raptiva | October 24,<br>2005 | December<br>22, 2008 | Progressive multifocal<br>leukoencephalopathy                                                          | Feb. 22,<br>2009    | Progressive<br>multifocal<br>leukoencephal-<br>opathy |
| 26 |                  |         |                     |                      |                                                                                                        |                     |                                                       |
| 27 |                  |         |                     |                      |                                                                                                        |                     |                                                       |
| 28 |                  |         |                     |                      |                                                                                                        |                     |                                                       |
| 29 |                  |         |                     |                      |                                                                                                        |                     |                                                       |
| 30 | Erlotinib        | Tarceva | July 7, 2005        | December<br>12, 2008 | Increased risk of death<br>in patients with<br>moderate hepatic<br>impairment & corneal<br>perforation |                     |                                                       |
| 31 |                  |         |                     |                      |                                                                                                        |                     |                                                       |
| 32 |                  |         |                     |                      |                                                                                                        |                     |                                                       |
| 33 |                  |         |                     |                      |                                                                                                        |                     |                                                       |
| 34 |                  |         |                     |                      |                                                                                                        |                     |                                                       |
| 35 |                  |         |                     |                      |                                                                                                        |                     |                                                       |
| 36 |                  |         |                     |                      |                                                                                                        |                     |                                                       |
| 37 |                  |         |                     |                      |                                                                                                        |                     |                                                       |
| 38 | Etanercept       | Enbrel  | December<br>1, 2000 | January<br>13, 2006  | Risk of hepatitis B virus<br>infection                                                                 |                     |                                                       |
| 39 |                  |         |                     |                      |                                                                                                        |                     |                                                       |
| 40 |                  |         |                     |                      |                                                                                                        |                     |                                                       |
| 41 |                  |         |                     |                      |                                                                                                        |                     |                                                       |
| 42 |                  |         |                     |                      |                                                                                                        |                     |                                                       |
| 43 |                  |         |                     |                      |                                                                                                        |                     |                                                       |
| 44 |                  |         |                     |                      |                                                                                                        |                     |                                                       |
| 45 |                  |         |                     |                      |                                                                                                        |                     |                                                       |
| 46 |                  |         |                     |                      |                                                                                                        |                     |                                                       |
| 47 |                  |         |                     |                      |                                                                                                        |                     |                                                       |
| 48 |                  |         |                     |                      |                                                                                                        |                     |                                                       |
| 49 |                  |         |                     |                      |                                                                                                        |                     |                                                       |

|    |                 |                             |                   |                   |                                                                              |               |                              |
|----|-----------------|-----------------------------|-------------------|-------------------|------------------------------------------------------------------------------|---------------|------------------------------|
| 1  |                 |                             |                   |                   |                                                                              |               |                              |
| 2  |                 |                             |                   |                   |                                                                              |               |                              |
| 3  |                 |                             |                   |                   |                                                                              |               |                              |
| 4  |                 |                             |                   |                   |                                                                              |               |                              |
| 5  | Etravirine      | Intelence                   | March 27, 2008    | October 15, 2009  | Severe skin & hypersensitivity reactions                                     |               |                              |
| 6  |                 |                             |                   |                   |                                                                              |               |                              |
| 7  |                 |                             |                   |                   |                                                                              |               |                              |
| 8  |                 |                             |                   |                   |                                                                              |               |                              |
| 9  | Ezetimibe       | Ezetrol                     | May 12, 2003      | Feb. 1, 2005      | Myalgia, rhabdomyolysis, hepatitis, pancreatitis & thrombocytopenia          |               |                              |
| 10 |                 |                             |                   |                   |                                                                              |               |                              |
| 11 |                 |                             |                   |                   |                                                                              |               |                              |
| 12 |                 |                             |                   |                   |                                                                              |               |                              |
| 13 |                 |                             |                   |                   |                                                                              |               |                              |
| 14 |                 |                             |                   |                   |                                                                              |               |                              |
| 15 | Formoterol      | Foradil dry powder capsules | March 6, 1997     | September 7, 2005 | Increased risk of asthma-related deaths in patients who also used salmeterol |               |                              |
| 16 |                 |                             |                   |                   |                                                                              |               |                              |
| 17 |                 |                             |                   |                   |                                                                              |               |                              |
| 18 |                 |                             |                   |                   |                                                                              |               |                              |
| 19 |                 |                             |                   |                   |                                                                              |               |                              |
| 20 |                 |                             |                   |                   |                                                                              |               |                              |
| 21 |                 |                             |                   |                   |                                                                              |               |                              |
| 22 | Fosamprenavir   | Telzir                      | December 10, 2004 | July 17, 2009     | Myocardial infarction                                                        |               |                              |
| 23 |                 |                             |                   |                   |                                                                              |               |                              |
| 24 | Gadoversetamide | Optimark                    | December 11, 2000 | January 8, 2010   | Nephrogenic systemic fibrosis                                                |               |                              |
| 25 |                 |                             |                   |                   |                                                                              |               |                              |
| 26 |                 |                             |                   |                   |                                                                              |               |                              |
| 27 | Galantamine     | Reminyl                     | July 31, 2001     | April 18, 2005    | Increase in mortality in patients with mild cognitive impairment             |               |                              |
| 28 |                 |                             |                   |                   |                                                                              |               |                              |
| 29 |                 |                             |                   |                   |                                                                              |               |                              |
| 30 |                 |                             |                   |                   |                                                                              |               |                              |
| 31 |                 |                             |                   |                   |                                                                              |               |                              |
| 32 | Gatifloxacin    | Tequin                      | January 9, 2001   | December 19, 2005 | Serious hypoglycemia and hyperglycemia                                       | June 29, 2006 | Glucose metabolism disorders |
| 33 |                 |                             |                   |                   |                                                                              |               |                              |
| 34 |                 |                             |                   |                   |                                                                              |               |                              |
| 35 |                 |                             |                   |                   |                                                                              |               |                              |
| 36 |                 |                             |                   |                   |                                                                              |               |                              |
| 37 |                 |                             |                   |                   |                                                                              |               |                              |
| 38 |                 |                             |                   |                   |                                                                              |               |                              |
| 39 |                 |                             |                   |                   |                                                                              |               |                              |
| 40 |                 |                             |                   |                   |                                                                              |               |                              |
| 41 |                 |                             |                   |                   |                                                                              |               |                              |
| 42 |                 |                             |                   |                   |                                                                              |               |                              |
| 43 |                 |                             |                   |                   |                                                                              |               |                              |
| 44 |                 |                             |                   |                   |                                                                              |               |                              |
| 45 |                 |                             |                   |                   |                                                                              |               |                              |
| 46 |                 |                             |                   |                   |                                                                              |               |                              |
| 47 |                 |                             |                   |                   |                                                                              |               |                              |
| 48 |                 |                             |                   |                   |                                                                              |               |                              |
| 49 |                 |                             |                   |                   |                                                                              |               |                              |

|    |                    |           |                    |                    |                                                                                         |                     |
|----|--------------------|-----------|--------------------|--------------------|-----------------------------------------------------------------------------------------|---------------------|
| 1  |                    |           |                    |                    |                                                                                         |                     |
| 2  |                    |           |                    |                    |                                                                                         |                     |
| 3  |                    |           |                    |                    |                                                                                         |                     |
| 4  |                    |           |                    |                    |                                                                                         |                     |
| 5  | Gefitinib          | Iressa    | December 17, 2003  | August 26, 2005    | Restricted use to patients whose tumours are EGFR expression status positive or unknown |                     |
| 6  |                    |           |                    |                    |                                                                                         |                     |
| 7  |                    |           |                    |                    |                                                                                         |                     |
| 8  |                    |           |                    |                    |                                                                                         |                     |
| 9  |                    |           |                    |                    |                                                                                         |                     |
| 10 |                    |           |                    |                    |                                                                                         |                     |
| 11 | Grepafloxacin      | Raxar     | April 9, 1998      |                    |                                                                                         | October 26, 1999    |
| 12 |                    |           |                    |                    |                                                                                         | Cardiac arrhythmias |
| 13 | Ibritumomab        | Zevalin   | May 10, 2005       | December 7, 2005   | Severe mucocutaneous reactions                                                          |                     |
| 14 |                    |           |                    |                    |                                                                                         |                     |
| 15 |                    |           |                    |                    |                                                                                         |                     |
| 16 |                    |           |                    |                    |                                                                                         |                     |
| 17 |                    |           |                    |                    |                                                                                         |                     |
| 18 | Imatinib           | Gleevec   | September 20, 2001 | September 21, 2006 | Significant decrease in left ventricular ejection failure and congestive heart failure  |                     |
| 19 |                    |           |                    |                    |                                                                                         |                     |
| 20 |                    |           |                    |                    |                                                                                         |                     |
| 21 |                    |           |                    |                    |                                                                                         |                     |
| 22 |                    |           |                    |                    |                                                                                         |                     |
| 23 |                    |           |                    |                    |                                                                                         |                     |
| 24 | Infliximab         | Remicade  | September 27, 2001 | November 29, 2004  | Risk of malignancies                                                                    |                     |
| 25 |                    |           |                    |                    |                                                                                         |                     |
| 26 | Infliximab         | Remicade  | June 6, 2001       | November 29, 2004  | Risk of malignancies                                                                    |                     |
| 27 |                    |           |                    |                    |                                                                                         |                     |
| 28 |                    |           |                    |                    |                                                                                         |                     |
| 29 | Interferon Beta-1A | Rebif     | February 5, 1998   | December 4, 2003   | Hepatotoxicity                                                                          |                     |
| 30 |                    |           |                    |                    |                                                                                         |                     |
| 31 |                    |           |                    |                    |                                                                                         |                     |
| 32 | Irinotecan         | Camptosar | July 4, 1997       | May 11, 2001       | Increased mortality in clinical trials                                                  |                     |
| 33 |                    |           |                    |                    |                                                                                         |                     |
| 34 |                    |           |                    |                    |                                                                                         |                     |
| 35 | Leflunomide        | Arava     | March 16, 2000     | May 4, 2001        | Hepatotoxicity                                                                          |                     |
| 36 |                    |           |                    |                    |                                                                                         |                     |
| 37 |                    |           |                    |                    |                                                                                         |                     |
| 38 | Levofloxacin       | Levaquin  | Nov. 14, 1997      | Mar. 9, 2012       | Worsening of symptoms of myasthenia gravis                                              |                     |
| 39 |                    |           |                    |                    |                                                                                         |                     |
| 40 |                    |           |                    |                    |                                                                                         |                     |
| 41 |                    |           |                    |                    |                                                                                         |                     |
| 42 |                    |           |                    |                    |                                                                                         |                     |
| 43 |                    |           |                    |                    |                                                                                         |                     |
| 44 |                    |           |                    |                    |                                                                                         |                     |
| 45 |                    |           |                    |                    |                                                                                         |                     |
| 46 |                    |           |                    |                    |                                                                                         |                     |
| 47 |                    |           |                    |                    |                                                                                         |                     |
| 48 |                    |           |                    |                    |                                                                                         |                     |
| 49 |                    |           |                    |                    |                                                                                         |                     |



|    |                        |           |            |           |                           |
|----|------------------------|-----------|------------|-----------|---------------------------|
| 1  |                        |           |            |           |                           |
| 2  |                        |           |            |           |                           |
| 3  |                        |           |            |           |                           |
| 4  |                        |           |            |           |                           |
| 5  | Lumiracoxib            | Prexige   | November   |           | October 3, Hepatotoxicity |
| 6  |                        |           | 2, 2006    |           | 2007                      |
| 7  | Methylnatrexone        | Relistor  | March 28,  | July 28,  | Gastrointestinal          |
| 8  |                        |           | 2008       | 2010      | perforation               |
| 9  | Mirtazapine            | Remeron   | May 18,    | May 26,   | Risk of self harm         |
| 10 |                        |           | 2001       | 2004      |                           |
| 11 | Modafinil              | Alertec   | February   | December  | Serious rash, allergic    |
| 12 |                        |           | 26, 1999   | 18, 2007  | reactions & mental        |
| 13 |                        |           |            |           | problems                  |
| 14 | Moroctocog alpha       | Refacto   | May 28,    | September | Lack of effect            |
| 15 |                        |           | 2002       | 15, 2003  |                           |
| 16 | Moxifloxacin           | Avelox    | Oct. 19,   | Mar. 9,   | Worsening of symptoms     |
| 17 |                        |           | 2000       | 2012      | of myasthenia gravis      |
| 18 | Natalizumab            | Tysabri   | September  | June 2,   | Liver injury &            |
| 19 |                        |           | 28, 2006   | 2008      | hypersensitivity          |
| 20 | Nevirapine             | Viramune  | September  | November  | Severe life-threatening   |
| 21 |                        |           | 4, 1998    | 10, 2000  | & fatal hepatotoxicity    |
| 22 | Norelgestromin/ethinyl | Evra      | August 20, | November  | Increased risk of venous  |
| 23 | estradiol              |           | 2002       | 21, 2006  | thromboembolism           |
| 24 | Oxcarbazepine          | Trileptal | April 13,  | April 27, | Life-threatening          |
| 25 |                        |           | 2000       | 2005      | dermatological reactions  |
| 26 |                        |           |            |           | & multi-organ             |
| 27 |                        |           |            |           | hypersensitivity          |
| 28 |                        |           |            |           |                           |
| 29 |                        |           |            |           |                           |
| 30 |                        |           |            |           |                           |
| 31 |                        |           |            |           |                           |
| 32 |                        |           |            |           |                           |
| 33 |                        |           |            |           |                           |
| 34 |                        |           |            |           |                           |
| 35 |                        |           |            |           |                           |
| 36 |                        |           |            |           |                           |
| 37 |                        |           |            |           |                           |
| 38 |                        |           |            |           |                           |
| 39 |                        |           |            |           |                           |
| 40 |                        |           |            |           |                           |
| 41 |                        |           |            |           |                           |
| 42 |                        |           |            |           |                           |
| 43 |                        |           |            |           |                           |
| 44 |                        |           |            |           |                           |
| 45 |                        |           |            |           |                           |
| 46 |                        |           |            |           |                           |
| 47 |                        |           |            |           |                           |
| 48 |                        |           |            |           |                           |
| 49 |                        |           |            |           |                           |

|    |               |           |                   |                  |                                                                                              |                                 |
|----|---------------|-----------|-------------------|------------------|----------------------------------------------------------------------------------------------|---------------------------------|
| 1  |               |           |                   |                  |                                                                                              |                                 |
| 2  |               |           |                   |                  |                                                                                              |                                 |
| 3  |               |           |                   |                  |                                                                                              |                                 |
| 4  |               |           |                   |                  |                                                                                              |                                 |
| 5  | Pegaptanib    | Macugen   | May 2, 2005       | January 12, 2006 | Hypersensitivity reaction                                                                    |                                 |
| 6  |               |           |                   |                  |                                                                                              |                                 |
| 7  | Pegvisomant   | Somavert  | October 17, 2005  | June 2, 2008     | Marked hepatic enzyme elevations (>10 times normal) with pegvisomant & somatostatin analogue |                                 |
| 8  |               |           |                   |                  |                                                                                              |                                 |
| 9  |               |           |                   |                  |                                                                                              |                                 |
| 10 |               |           |                   |                  |                                                                                              |                                 |
| 11 |               |           |                   |                  |                                                                                              |                                 |
| 12 |               |           |                   |                  |                                                                                              |                                 |
| 13 |               |           |                   |                  |                                                                                              |                                 |
| 14 |               |           |                   |                  |                                                                                              |                                 |
| 15 | Pioglitazone  | Actos     | August 17, 2000   | April 18, 2007   | Increased incidence of fractures in women                                                    |                                 |
| 16 |               |           |                   |                  |                                                                                              |                                 |
| 17 |               |           |                   |                  |                                                                                              |                                 |
| 18 |               |           |                   |                  |                                                                                              |                                 |
| 19 | Raloxifene    | Evista    | November 6, 1998  | May 18, 2006     | Increased mortality due to stroke                                                            |                                 |
| 20 |               |           |                   |                  |                                                                                              |                                 |
| 21 | Repaglinide   | Gluconorm | April 6, 1999     | July 17, 2003    | Should not be used in combination with gemfibrozil risk of severe and prolonged hypoglycemia |                                 |
| 22 |               |           |                   |                  |                                                                                              |                                 |
| 23 |               |           |                   |                  |                                                                                              |                                 |
| 24 |               |           |                   |                  |                                                                                              |                                 |
| 25 |               |           |                   |                  |                                                                                              |                                 |
| 26 |               |           |                   |                  |                                                                                              |                                 |
| 27 |               |           |                   |                  |                                                                                              |                                 |
| 28 |               |           |                   |                  |                                                                                              |                                 |
| 29 | Rituximab     | Rituxan   | March 17, 2000    | July 27, 2004    | Hepatitis B reactivation                                                                     |                                 |
| 30 |               |           |                   |                  |                                                                                              |                                 |
| 31 |               |           |                   |                  |                                                                                              |                                 |
| 32 | Rofecoxib     | Vioxx     | October 25, 1999  | April 15, 2002   | Increase in cardiovascular risk                                                              | September 30, 2004              |
| 33 |               |           |                   |                  |                                                                                              | Increased cardiovascular events |
| 34 |               |           |                   |                  |                                                                                              |                                 |
| 35 |               |           |                   |                  |                                                                                              |                                 |
| 36 | Rosiglitazone | Avandia   | March 21, 2000    | November 9, 2010 | Restrictions on use due to cardiac safety                                                    |                                 |
| 37 |               |           |                   |                  |                                                                                              |                                 |
| 38 |               |           |                   |                  |                                                                                              |                                 |
| 39 | Rosuvastatin  | Crestor   | February 18, 2003 | June 15, 2004    | Rhabdomyolysis                                                                               |                                 |
| 40 |               |           |                   |                  |                                                                                              |                                 |
| 41 |               |           |                   |                  |                                                                                              |                                 |
| 42 |               |           |                   |                  |                                                                                              |                                 |
| 43 |               |           |                   |                  |                                                                                              |                                 |
| 44 |               |           |                   |                  |                                                                                              |                                 |
| 45 |               |           |                   |                  |                                                                                              |                                 |
| 46 |               |           |                   |                  |                                                                                              |                                 |
| 47 |               |           |                   |                  |                                                                                              |                                 |
| 48 |               |           |                   |                  |                                                                                              |                                 |
| 49 |               |           |                   |                  |                                                                                              |                                 |

1  
2  
3  
4  
5  
6  
7  
8  
9  
10  
11  
12  
13  
14  
15  
16  
17  
18  
19  
20  
21  
22  
23  
24  
25  
26  
27  
28  
29  
30  
31  
32  
33  
34  
35  
36  
37  
38  
39  
40  
41  
42  
43  
44  
45  
46  
47  
48  
49

|               |          |                    |                    |                                                                                                        |                   |                               |
|---------------|----------|--------------------|--------------------|--------------------------------------------------------------------------------------------------------|-------------------|-------------------------------|
| Sibutramine   | Meridia  | December 28, 2000  |                    |                                                                                                        | October 8, 2010   | Serious cardiovascular events |
| Sildenafil    | Viagra   | March 8, 1999      | June 19, 2006      | Serious visual disturbances                                                                            |                   |                               |
| Sirolimus     | Rapamune | January 5, 2001    | May 14, 2002       | Increase in mortality, graft loss & hepatic artery thrombosis when used in conjunction with tacrolimus |                   |                               |
| Sitaxsentan   | Thelin   | May 30, 2007       | July 9, 2007       | Hepatotoxicity, risks to fetus & important drug-drug interactions                                      | December 15, 2010 | Hepatotoxicity                |
| Tadalafil     | Cialis   | September 17, 2003 | June 19, 2006      | Serious visual disturbances                                                                            |                   |                               |
| Tegaserod     | Zelnorm  | March 12, 2002     | April 28, 2004     | Diarrhoea & ischemic colitis                                                                           | March 30, 2007    | Cardiovascular events         |
| Telbivudine   | Sebivo   | November 28, 2006  | March 7, 2008      | Risk of peripheral neuropathy with telbivudine & interferon                                            |                   |                               |
| Telithromycin | Ketek    | May 28, 2003       | September 29, 2006 | Hepatic events, aggravation of myasthenia gravis & syncope                                             |                   |                               |

1  
2  
3  
4  
5  
6  
7  
8  
9  
10  
11  
12  
13  
14  
15  
16  
17  
18  
19  
20  
21  
22  
23  
24  
25  
26  
27  
28  
29  
30  
31  
32  
33  
34  
35  
36  
37  
38  
39  
40  
41  
42  
43  
44  
45  
46  
47  
48  
49

|               |                  |                   |                    |                                                                                                                   |                   |                |
|---------------|------------------|-------------------|--------------------|-------------------------------------------------------------------------------------------------------------------|-------------------|----------------|
| Temsirolimus  | Torisel          | December 21, 2007 | August 6, 2008     | Hypersensitivity/infusion reactions                                                                               |                   |                |
| Tenofovir     | Viread           | Mar. 18, 2003     | June 9, 2005       | Co-administration with didanosine and either efavirenz or nevirapine can lead to high rate of virological failure |                   |                |
| Tipranavir    | Aptivus          | November 21, 2005 | June 29, 2006      | Intracranial hemorrhage                                                                                           |                   |                |
| Tocilizumab   | Actemra          | April 30, 2010    | September 13, 2010 | Fatal anaphylaxis                                                                                                 |                   |                |
| Tolcapone     | Tasmar           | October 8, 1997   |                    |                                                                                                                   | November 20, 1998 | Hepatotoxicity |
| Topiramate    | Topamax          | March 6, 1997     | September 13, 2001 | Acute myopia & secondary angle closure glaucoma                                                                   |                   |                |
| Trastuzumab   | Herceptin        | Aug. 13, 1999     | Apr. 21, 2009      | Oligohydramnios                                                                                                   |                   |                |
| Troglitazone  | Rezulin          | May 9, 1997       |                    |                                                                                                                   | March 15, 2000    | Hepatotoxicity |
| Trovafloxacin | Trovan (tablets) | December 4, 1998  |                    |                                                                                                                   | November 22, 2001 | Hepatotoxicity |
| Valdecoxib    | Bextra           | December 11, 2002 | December 31, 2002  | Serious skin reactions                                                                                            | April 21, 2005    | Skin reactions |

1  
2  
3  
4  
5  
6  
7  
8  
9  
10  
11  
12  
13  
14  
15  
16  
17  
18  
19  
20  
21  
22  
23  
24  
25  
26  
27  
28  
29  
30  
31  
32  
33  
34  
35  
36  
37  
38  
39  
40  
41  
42  
43  
44  
45  
46  
47  
48  
49

|                 |          |                  |                 |                                                        |
|-----------------|----------|------------------|-----------------|--------------------------------------------------------|
| Vandetanib      | Caprelsa | Jan. 12, 2012    | Feb. 13, 2012   | QTc prolongation, Torsade de Pointes & sudden death    |
| Vardenafil      | Levitra  | March 17, 2004   | June 19, 2006   | Serious visual disturbances                            |
| Varenicline     | Champix  | January 24, 2007 | June 13, 2008   | Serious neuropsychiatric adverse events                |
| Zafirlukast     | Accolate | October 21, 1997 | October 7, 2002 | Hepatotoxicity                                         |
| Zoledronic acid | Zometa   | August 21, 2000  | August 9, 2005  | Clinically significant deterioration in renal function |

For peer review only
